# Supplementary material for: Improved end-member characterisation of modern organic matter pools in the Ohrid Basin (Albania, Macedonia) and evaluation of new palaeoenvironmental proxies
Source: Copernicus journal article supplement (doi:10.5194/bg-13-795-2016), 2016-02-11
Supplement: Supplementary file 1 [file bg-13-795-2016-supplement.zip]

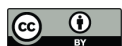

## *Supplement of*

# **Improved end-member characterisation of modern organic matter pools in the Ohrid Basin (Albania, Macedonia) and evaluation of new palaeoenvironmental proxies**

**J. Holtvoeth et al.**

*Correspondence to:* J. Holtvoeth (j.holtvoeth@bristol.ac.uk)

- bg-13-795-2016-supplement-title-page.pdf
- Figure S1 carbon isotopes .pdf
- Figure S2 hydrogen isotopes.pdf
- Figure S3 5b-stanols.pdf
- Supplement 1 - Biomarker data.xlsx
- Supplement 2 - Isotopes and further biomarker info.pdf
- \_\_MACOSX
  - .\_Figure S1 carbon isotopes .pdf
  - .\_Figure S2 hydrogen isotopes.pdf
  - .\_Figure S3 5b-stanols.pdf
  - .\_Supplement 1 - Biomarker data.xlsx
  - .\_Supplement 2 - Isotopes and further biomarker info.pdf

The copyright of individual parts of the supplement might differ from the CC-BY 3.0 licence.
