# Supplementary material for: Improved end-member characterisation of modern organic matter pools in the Ohrid Basin (Albania, Macedonia) and evaluation of new palaeoenvironmental proxies
Source: Copernicus journal article supplement (doi:10.5194/bg-13-795-2016), 2016-02-11
Supplement: Supplementary file 1 [file Supplement 1 - Biomarker data.xlsx]

## Sheet: biomarkers
sample ID	description	sample (g)	sum lipids (%lipids)	C12 FAMe (ng)	C13 FAMe (ng)	C14 FAMe (ng)	C15 FAMe (ng)	C16 FAMe (ng)	C17 FAMe (ng)	C18 FAMe (ng)	C19 FAMe (ng)	C20 FAMe (ng)	C21 FAMe (ng)	C22 FAMe (ng)	C23 FAMe (ng)	C24 FAMe (ng)	C25 FAMe (ng)	C26 FAMe (ng)	C27 FAMe (ng)	C28 FAMe (ng)	C29 FAMe (ng)	C30 FAMe (ng)	C31 FAMe (ng)	C32 FAMe (ng)	C33 FAMe (ng)	C34 FAMe (ng)	ω-C12 OH-FA (ng)	a-C12 OH-FA (ng)	a-C15 OH-FA (ng)	ω-C14 OH-FA (ng)	a-C16 OH-FA (ng)	a-C17 OH-FA (ng)	ω-C16 OH-FA (ng)	?	a-C18 OH-FA (ng)	unsat. a-C18 OH-FA (ng)	ω-C17 OH-FA (ng)	ω-C18 OH-FA (ng)	unsat. a-C20 OH-FA (ng)	a-C20 OH-FA (ng)	ω-C19 OH-FA (ng)	a-C21 OH-FA (ng)	ω-C20 OH-FA (ng)	a-C22 OH-FA (ng)	ω-C21 OH-FA (ng)	a-C23 OH-FA (ng)	ω-C22 OH-FA (ng)	a-C24 OH-FA (ng)	ω-C23 OH-FA (ng)
SOILS
BOB-S	small oaks and beeches, top soil	1.9894	100			0.227081	0.0482588	7.59025	0.180048	1.27588	0.0847821	1.81881	0.556159	5.02344	1.7	4.46026	0.950023	2.15676	0.655133	2.47666	1.07383	2.74576	0.604568	0.967313			0.0562819						0.380678						0.0299389				0.42939	0.223324	0.0724216	0.184193	2.77661	0.73638	0.0703074
BOB-S*	"	0.742	100			0.370865	0.203266	7.99559	0.209631	1.59434	0.0821894	1.77975	0.446975	4.03886	1.46419	3.51242	0.796781	2.10021	0.689484	2.724	1.10977	4.36145	0.632612	2.60019	0.153354	0.409779				0.0344012	0.12661	0.0132961	0.416261				0.0123921	0.119346			0.0269273		0.512752	0.286347	0.0830376	0.288279	3.52605	1.16735	0.13336
BOB-S-F	top soil + fungus (white rot)	2.0709	100			0.396096	0.703464	9.09421	0.238627	3.30751	0.0386734	1.33409	0.384556	3.83989	1.30704	3.49737	0.609895	1.91208	0.499804	2.89037	0.844105	6.21147	0.680791	3.01501	0.145984								0.216782		0.0515092			0.0628619					0.221234	0.169225	0.021739	0.171744	2.06839	0.634819	0.0726318
BOB-S-F*		1.5478	100	0.241961	0.0581833	0.556138	0.285813	8.64636	0.217491	2.58284	0.0744679	1.5889	0.460151	4.00077	1.36408	3.71431	0.767977	2.01474	0.756743	2.67532	0.879223	4.27326	0.443798	2.13772	0.130565	0.420864	0.0147783						0.232892		0.0327798			0.0961322		0.0156233	0.0126779	0.0115117	0.239053	0.190179	0.0424876	0.157764	2.12931	0.667694	0.0794061
SN-FTS	small oaks and beeches, top soil	2.5146	100	0.305571		0.781197	0.324227	8.42835	0.199279	1.6512	0.0908173	1.62722	0.474217	4.48512	1.06815	3.65335	0.822921	2.67595	0.703625	2.90359	0.763679	4.23633	0.328429	1.14181							0.0577746	0.0181164	0.299067					0.0802357				0.0234609	0.403972	0.196268	0.0503443	0.160358	2.05937	0.565513	0.0620523
SN-FTS*	"	1.5174	100	0.320017		0.702754	0.182971	6.51052	0.132135	1.25552	0.0436517	1.28465	0.343021	3.56659	1.02515	3.36654	0.861325	2.70314	0.804088	3.21101	1.04738	4.15489	0.320424	1.25283							0.065736	0.0180448	0.284645		0.023237			0.127631			0.0115896		0.325147	0.180614	0.0445757	0.164704	1.85682	0.54965	0.0620058
PA-S	beech forest, top soil	2.4502	100			0.104447	0.048688	3.27557	0.0619774	0.978715	0.0537848	0.971947	0.339769	3.68015	0.972136	4.05628	0.68563	3.57793	1.00321	5.77529	0.788193	3.62256	0.462048	1.61564	0.189438	0.491974	0.0383505			0.0347953	0.0369862	0.0204772	0.391749					0.0560361			0.0204098		0.256448	0.0898019	0.0431964	0.0730397	1.39764	0.259723	0.0721182
PA-S*	"	0.7518	100			0.25135	0.172299	5.69675	0.10945	1.47838	0.0554104	1.19857	0.282877	3.02953	0.659801	2.63658	0.491726	2.15893	0.521831	3.2276	0.357534	1.83598	0.266333	0.528037	0.113698	0.222061	0.0523633			0.0547516	0.0875769	0.0211201	0.462511				0.00895306	0.086336			0.0134881		0.293052	0.142843	0.0770194	0.0962342	1.53633	0.39096	0.0623557
DG-S	red mineral soil under shrubs	2.3647	100					5.31546		1.82444		1.16766	0.21081	2.57263	0.224405	1.56723		0.805016		0.861217		0.158471											0.0703681										0.0739251				0.722468	0.323837
LEAF LITTER
BOB-LL		0.4393	100			0.940134	0.229312	13.8673	0.167752	1.86201		2.17993	0.418829	3.30094	0.811246	2.79176	0.51629	2.09364	0.204494	3.00433	0.610499	4.11998	0.312882	0.877787							0.0632251											0.0297408		0.472162		0.255583		0.897955
SN-LL		2.9484	100	0.45616		1.57695	0.206492	10.5332	0.362419	2.06236	0.0970645	1.44877	0.405054	1.78688	0.525521	1.51777	0.697626	3.75217	0.590819	3.96239	0.437224	3.96981	0.100725	0.607607					0.0257976		0.157231		0.119033					0.0340221		0.0354789		0.0631915	0.0536393	0.651331		0.391216		1.20871
SN-LL*		0.9029	100	0.675112		1.82852	0.289836	10.4071	0.300424	2.02708	0.102551	1.65193	0.436327	1.8694	0.495646	1.52606	0.34722	3.16874	0.362511	3.77304	0.328682	4.84422	0.0980294	0.383943							0.1635		0.210419		0.0368163			0.0347462		0.0334087		0.0678397	0.0555522	0.905769		0.556368	0.1731	1.68356
PA-LL		1.3955	100			0.638125	0.14069	10.4804	0.140826	2.40247	0.0221724	0.901469	0.310389	2.85897	0.415128	1.08834	0.174806	0.715587	0.122146	1.93119		0.176616											0.494754				0.0136344	0.0450667					0.0184262	0.0627485		0.0314716	0.0763708	0.127047
MACROPHYTES
TU 1-3*	cladophora	0.1165	100			6.52597	0.402866	36.8202	0.217328	1.45537		0.179355		0.274942	0.0992751	0.303451		0.0818468																										0.062061		0.0373467		0.13348
TU 1-4	potamogeton perfoliatus	0.1439	100			0.221444		18.2319	0.0517783	2.16661	0.0417099	0.415235	0.0550351	1.07548	0.245645	0.994221	0.0569804	0.244339		0.136396																								0.0620492				0.116644
TU 1-6*	"	0.1626	100			0.341107	0.199953	15.1075	0.257254	1.68357	0.0812951	0.476662	0.126725	0.74641	0.336788	0.879636	0.121352	0.433529	0.0427247	0.536217		0.109933									0.0743503													0.0998317		0.0309183		0.213723
TU 1-8	chara tomentosa	0.5318	100			3.13599	0.143678	27.6206	0.120554	1.14646		0.163051		0.663137		0.191604
TU 1-12*	"	0.2495	100			3.60795	0.292516	30.9312	0.35569	1.53149	0.127884	0.147617	0.0627055	0.666256	0.0832081	0.427289		0.0426869
PG 1-6	cladophora	0.0968	100			8.13941	0.306658	33.6377		1.05241		0				0.0979139		0.0339242																														0.0712834
PG 1-14	chara contraria	0.0873	100			0.824043		23.2003	0.187166	1.62853	0.143179	0.0922131	0.0458136	0.211307	0.0585136	0.149158
DG-RL	phragmites leaves	0.7602	100			0.339923		11.0639	0.149668	1.05604		0.345782		0.236789	0.109671	0.257828		0.353597		0.598377		0.284614																		0.258221				0.0816681				0.163105
RL*	phragmites leaves	0.2556	100			0.441708	0.0467806	11.061	0.112444	1.03208	0.0263932	0.355606	0.050408	0.246164	0.0929651	0.285041	0.0659828	0.442878		0.572657		0.287512		0.0350183																0.0585982				0.0544763				0.0581461
DG-RS	phragmites stem	1.2162	100	0.215371		2.56446	0.228837	23.8405	0.153152	0.962639	0.180591	2.51887	0.345361	0.639986	0.448154	1.3544	0.281526	1.02316	0.0374066	0.495491		0.26988		0.208018																0.33773		0.0271207	0.0696561	0.182073		0.0506391	0.087909	0.277305
DG-RR	phragmites roots	1.1809	100	0.110805	0.0148434	0.312607	0.268312	17.3673	0.121179	1.04427	0.192745	3.47108	0.357189	1.47007	0.666459	3.54599	0.537169	1.27491	0.0786759	0.584576		0.354674																		0.526303		0.0361959	0.0752431	0.358608		0.0651956	0.317761	0.719829	0.0158065
AOR	algae on reed	0.7318	100	2.88297	0.0822186	13.2012	0.403968	38.71	0.115391	1.44532		0.361069		0.189736		0.706037		0.0968718
PTMG	potamogeton ?	1.168	100			0.238819	0.0896528	16.4827	0.209699	2.48822	0.131358	0.64023	0.0981681	1.01569	0.340075	0.943181		0.206214													0.118962													0.118345				0.240888
filtered lake water
1202-5-P			100			0.442246	0.512208	19.7588	0.576161	8.30185	0.161837	0.616063	0.226926	1.01235	0.437984	1.12678	0.183161	0.71566	0.0578526	0.198772		0.120666						0.0820142	0.325754		0.118245		0.0308955		0.0603458					0.0445046				0.102674		0.0428946	0.324089	0.142572
1202-40-P			100					17.3607	0.615163	9.13726	0.199364	0.894341	0.303952	1.50833	0.645206	1.56868	0.21877	0.8717											0.23574		0.157052				0.0610696									0.0608637		0.0416393	0.0749551	0.0981388
1202-140-P			100					12.2949	0.705361	14.0957	0.319432	1.44697	0.411098	1.7976	0.81843	2.44341	0.263801	0.989806		0.224157									0.00973006		0.118538													0.125177				0.234357
DEEP-5-P			100					11.0998	0.485375	10.3506	0.271399	1.09334	0.427254	1.26052	0.708188	1.80081	0.278842	0.91678		0.257944									0.143601		0.166991		0.104072		0.0799427									0.0674451		0.0638106	0.0919466	0.122183
SEDIMENTS
429	8049.09	2.4847	100		0.216961	0.933713	0.310864	6.02205	0.377959	1.44761	0.235151	1.53175	0.346154	4.39639	0.734071	6.02012	0.478908	5.61526	0.483138	4.18097	0.345689	2.76185	0.176776	0.701926						0.569071	0.314215		1.0014		0.423145	0.086121							0.118657	0.0593084			0.634587	0.123537
430	8107.91	2.5709	100			0.893525	0.180985	5.98829		1.35228	0.127508	1.15404	0.184199	1.98279		1.21492	0.0945858	0.780127		0.718316		1.16714		0.902099									0.43538										0.0653416				0.162349	0.178252
431	8166.94	2.5243	100			0.87739	0.161168	6.03452	0.202463	1.38409		1.11658	0.102577	1.58524	0.142901	1.51657	0.0657372	0.80899		0.359784		0.518337		0.0539004			0.149804			0.321928	0.414075		0.532561		0.672713								0.0817624	0.276439			0.265727	0.579222
432	8226.17	2.4949	100			0.696022	0.239305	4.00391		1.19807	0.139044	1.17203	0.208195	3.79375	0.934927	7.7812	0.796096	8.05925	0.540008	7.60176	0.655192	4.55528	0.464201	1.45349						0.547014			1.13215	0.0616845				0.0563387					0.179867				1.17366
433	8290	2.0747	100			0.0617221	0.0716653	2.75973	0.228887	1.21327	0.146998	1.13682	0.386056	3.29132	1.02933	6.1116	0.853859	4.09394	0.395206	2.77749	0.473318	1.32503	0.190466	0.669463			0.162213			0.597298			1.19413					0.0603076					0.21494				1.25827
434	8345.28	2.5428	100			0.964647	0.321026	4.00498		1.01343	0.0985017	1.06066	0.229675	3.42015	0.854702	6.4348	0.664992	6.41095	0.636553	6.31594	0.500117	4.19116	0.336256	0.908088			0.14296			0.466999			0.93566					0.035986					0.160257				0.58288	0.0876576
435	8405.15	2.4451	100			1.49213	0.374529	5.39591	0.270298	1.31338	0.125569	1.28362	0.290166	3.77962	0.898493	8.18587	0.765142	7.99582	0.537606	5.94813	0.423897	3.42203	0.22135	1.04855						0.547803			0.998411					0.054165					0.128929				0.594338
436	8465.23	2.5219	100			1.22034	0.347553	3.998		1.13822	0.131891	1.15162	0.331753	3.29198	0.83534	5.88793	0.674497	5.78631	0.538481	5.29137	0.526022	3.83915	0.176837	0.926864			0.266538			0.536848			0.970483														0.358345
437	8525.52	2.5556	100			0.580843	0.244082	4.96338	0.192422	1.2517	0.101994	1.24835	0.240036	2.93003	0.689424	5.4127	0.426481	5.44949	0.261407	3.23807	0.265109	2.02825	0.175986	0.833833						0.688127	0.120624		1.25047	0.0370397	0.247042	0.0635467		0.0457248					0.152459				0.626975	0.0588108
438	8586.02	2.5253	100		0.126632	0.774632	0.230239	3.85779	0.174843	1.01869	0.120443	1.24603	0.315397	3.62267	0.905518	7.81879	0.710624	8.41958	0.655188	5.55404	0.33569	3.44002	0.152148	0.684389			0.152183			0.709015			1.43829	0.0525637				0.0573438					0.189755		0.0287491		0.958153	0.0619703
439	8646.73	2.5212	100		0.0599335	0.565747	0.297985	4.18552	0.10735	1.13675	0.152625	1.33567	0.374854	3.54949	0.949532	8.11291	0.930833	10.2415	1.0092	7.56953	0.640103	3.12462	0.246149	0.93415			0.208436			0.658288	0.0922191		1.33462	0.0583361	0.208415	0.0349124		0.0583578					0.151337				0.913873	0.108242	0.0409365
[truncated: 169 more columns]

## Sheet: biomarkers %lipids
Holtvoeth et al., manuscript bgd-12-1-2015 - total lipid data
	S O I L S										L E A F L I T T E R				G R A S S E S		M A C R O P H Y T E S											W A T E R F I L T R A T E S				S E D I M E N T S A M P L E S ( L Z 1 1 2 0 )
sample ID	TP-TS		TP-TS-F		SN-TS		GN-TS		DG-SS	DG-SS 2*	TP-LL	SN-LL		GN-LL	GN-G*	GP-G*	TU-3	TU-4	TU-6	TU 1-8	TU 1-12	PG 1-6	PG 1-14	DG-RL		DG-RS	DG-RR	1202-5-P	1202-40-P	1202-140-P	DEEP-5-P	429	430	431	432	433	434	435	436	437	438	439
description/age (yrs. B.P.)	small oaks and beeches, topsoil		top soil + fungus (white rot)		small oaks and beeches, topsoil		beech forest, topsoil		subsoil (Terra Rossa), weathered un-weath.		mainly oak	mainly oak		mainly beech	evergreen (festuca)	grass-lands	clad.	potam. perfoliatus		chara tomentosa		clad.	chara contraria	phragm. leaves		phragm. stem	phragm. roots					8049.09	8107.91	8166.94	8226.17	8290	8345.28	8405.15	8465.23	8525.52	8586.02	8646.73
sample (g)	1.9894	0.742	2.0709	1.5478	2.5146	1.5174	2.4502	0.7518	2.3647	5.5658	0.4393	2.9484	0.9029	1.3955	0.174	0.1438	0.1165	0.1439	0.1626	0.5318	0.2495	0.0968	0.0873	0.7602	0.2556	1.2162	1.1809					2.4847	2.5709	2.5243	2.4949	2.0747	2.5428	2.4451	2.5219	2.5556	2.5253	2.5212
total organic carbon (%)	7.60743	7.38846	9.59111	10.5633	11.6134	10.4431	8.70392	9.12654	0.891633	1.52149	44.1852	41.1224	-	-	-	-	40.2647	40.9702	40.6808	-	9.86813	-	10.3628	-	44.2175	-	-	-	-	-	-	1.49	1.68	1.71	1.56	1.48	1.94	2.05	2.16	2.19	2.243	2.29
total lipids (mg/g)	38.3371	155.966	94.3896	84.2061	39.4313	85.6693	74.0655	84.3092	1.29376	2.32084	471.08	559.619	727.774	652.551	1598.61	1297.78	1304.38	319.348	129.504	248.54	436.026	832.079	915.27	1527.98	1918.04	344.74	442.841	polar fraction of TLEs analysed, only				39.9078	14.3066	18.5485	23.96	7.57452	23.0668	33.1881	21.6126	42.9543	52.3669	80.4277
n-alkanoic acids
dodecanoic acid (C12 FA)	-	-	-	0.241961	0.305571	0.320017	-	-	-	-	-	0.454854	0.675112	-	0.849141	-	-	-	-	-	-	-	-	-	-	0.215371	0.110805	-	-	-	-	-	-	-	-	-	-	-	-	-	-	-
tridecanoic acid (C13 FA)	-	-	-	0.0581833	-	-	-	-	-	-	-	-	-	-	0.0425871	-	-	-	-	-	-	-	-	-	-	-	0.0148434	-	-	-	-	0.216961	-	-	-	-	-	-	-	-	0.126632	0.0599335
tetradecanoic acid (C14 FA)	0.227081	0.368536	0.396096	0.556138	0.781197	0.702754	0.104447	0.25135	-	-	0.940134	1.57243	1.82852	0.638125	1.59166	0.540109	6.52597	0.221444	0.341107	3.13599	3.60795	8.13941	0.824043	0.339923	0.441708	2.56446	0.312607	0.442246	-	-	-	0.933713	0.893525	0.87739	0.696022	0.0617221	0.964647	1.49213	1.22034	0.580843	0.774632	0.565747
pentadecanoic acid (C15 FA)	0.0482588	0.20199	0.703464	0.285813	0.324227	0.182971	0.048688	0.172299	-	0.11796	0.229312	0.2059	0.289836	0.14069	0.0800326	0.076999	0.402866	-	0.199953	0.143678	0.292516	0.306658	-	-	0.0467806	0.228837	0.268312	0.512208	-	-	-	0.310864	0.180985	0.161168	0.239305	0.0716653	0.321026	0.374529	0.347553	0.244082	0.230239	0.297985
hexadecanoic acid (C16 FA)	7.59025	7.94539	9.09421	8.64636	8.42835	6.51052	3.27557	5.69675	5.31546	7.28669	13.8673	10.503	10.4071	10.4804	14.3365	19.8021	36.8202	18.2319	15.1075	27.6206	30.9312	33.6377	23.2003	11.0639	11.061	23.8405	17.3673	19.7588	17.3607	12.2949	11.0998	6.02205	5.98829	6.03452	4.00391	2.75973	4.00498	5.39591	3.998	4.96338	3.85779	4.18552
heptadecanoic acid (C17 FA)	0.180048	0.208315	0.238627	0.217491	0.199279	0.132135	0.0619774	0.10945	-	0.346096	0.167752	0.361381	0.300424	0.140826	0.165525	0.172462	0.217328	0.0517783	0.257254	0.120554	0.35569	-	0.187166	0.149668	0.112444	0.153152	0.121179	0.576161	0.615163	0.705361	0.485375	0.377959	-	0.202463	-	0.228887	-	0.270298	-	0.192422	0.174843	0.10735
octadecanoic acid (C18 FA)	1.27588	1.58433	3.30751	2.58284	1.6512	1.25552	0.978715	1.47838	1.82444	4.37419	1.86201	2.05645	2.02708	2.40247	1.13542	1.82968	1.45537	2.16661	1.68357	1.14646	1.53149	1.05241	1.62853	1.05604	1.03208	0.962639	1.04427	8.30185	9.13726	14.0957	10.3506	1.44761	1.35228	1.38409	1.19807	1.21327	1.01343	1.31338	1.13822	1.2517	1.01869	1.13675
nonadecanoic acid (C19 FA)	0.0847821	0.0816734	0.0386734	0.0744679	0.0908173	0.0436517	0.0537848	0.0554104	-	0.130004	-	0.0967864	0.102551	0.0221724	0.0225539	0.0208391	-	0.0417099	0.0812951	-	0.127884	-	0.143179	-	0.0263932	0.180591	0.192745	0.161837	0.199364	0.319432	0.271399	0.235151	0.127508	-	0.139044	0.146998	0.0985017	0.125569	0.131891	0.101994	0.120443	0.152625
eicosanoic acid (C20 FA)	1.81881	1.76858	1.33409	1.5889	1.62722	1.28465	0.971947	1.19857	1.16766	2.2493	2.17993	1.44462	1.65193	0.901469	0.7183	0.692352	0.179355	0.415235	0.476662	0.163051	0.147617	0	0.0922131	0.345782	0.355606	2.51887	3.47108	0.616063	0.894341	1.44697	1.09334	1.53175	1.15404	1.11658	1.17203	1.13682	1.06066	1.28362	1.15162	1.24835	1.24603	1.33567
heneicosanoic acid (C21 FA)	0.556159	0.444169	0.384556	0.460151	0.474217	0.343021	0.339769	0.282877	0.21081	0.410874	0.418829	0.403894	0.436327	0.310389	0.0474075	0.0349963	-	0.0550351	0.126725	-	0.0627055	-	0.0458136	-	0.050408	0.345361	0.357189	0.226926	0.303952	0.411098	0.427254	0.346154	0.184199	0.102577	0.208195	0.386056	0.229675	0.290166	0.331753	0.240036	0.315397	0.374854
docosanoic acid (C22 FA)	5.02344	4.01351	3.83989	4.00077	4.48512	3.56659	3.68015	3.02953	2.57263	3.81934	3.30094	1.78176	1.8694	2.85897	0.548595	0.713124	0.274942	1.07548	0.74641	0.663137	0.666256	-	0.211307	0.236789	0.246164	0.639986	1.47007	1.01235	1.50833	1.7976	1.26052	4.39639	1.98279	1.58524	3.79375	3.29132	3.42015	3.77962	3.29198	2.93003	3.62267	3.54949
tricosanoic acid (C23 FA)	1.7	1.455	1.30704	1.36408	1.06815	1.02515	0.972136	0.659801	0.224405	1.08146	0.811246	0.524016	0.495646	0.415128	0.0876955	0.0914993	0.0992751	0.245645	0.336788	-	0.0832081	-	0.0585136	0.109671	0.0929651	0.448154	0.666459	0.437984	0.645206	0.81843	0.708188	0.734071	-	0.142901	0.934927	1.02933	0.854702	0.898493	0.83534	0.689424	0.905518	0.949532
tetracosanoic acid (C24 FA)	4.46026	3.49037	3.49737	3.71431	3.65335	3.36654	4.05628	2.63658	1.56723	5.46381	2.79176	1.51342	1.52606	1.08834	0.758935	0.625553	0.303451	0.994221	0.879636	0.191604	0.427289	0.0979139	0.149158	0.257828	0.285041	1.3544	3.54599	1.12678	1.56868	2.44341	1.80081	6.02012	1.21492	1.51657	7.7812	6.1116	6.4348	8.18587	5.88793	5.4127	7.81879	8.11291
pentacosanoic acid (C25 FA)	0.950023	0.791778	0.609895	0.767977	0.822921	0.861325	0.68563	0.491726	-	1.40451	0.51629	0.695627	0.34722	0.174806	0.20867	0.0567312	-	0.0569804	0.121352	-	-	-	-	-	0.0659828	0.281526	0.537169	0.183161	0.21877	0.263801	0.278842	0.478908	0.0945858	0.0657372	0.796096	0.853859	0.664992	0.765142	0.674497	0.426481	0.710624	0.930833
hexacosanoic acid (C26 FA)	2.15676	2.08702	1.91208	2.01474	2.67595	2.70314	3.57793	2.15893	0.805016	2.91276	2.09364	3.74142	3.16874	0.715587	0.520759	0.293639	0.0818468	0.244339	0.433529	-	0.0426869	0.0339242	-	0.353597	0.442878	1.02316	1.27491	0.71566	0.8717	0.989806	0.91678	5.61526	0.780127	0.80899	8.05925	4.09394	6.41095	7.99582	5.78631	5.44949	8.41958	10.2415
heptacosanoic acid (C27 FA)	0.655133	0.685155	0.499804	0.756743	0.703625	0.804088	1.00321	0.521831	-	0.973697	0.204494	0.589126	0.362511	0.122146	0.224962	0.0165286	-	-	0.0427247	-	-	-	-	-	-	0.0374066	0.0786759	0.0578526	-	-	-	0.483138	-	-	0.540008	0.395206	0.636553	0.537606	0.538481	0.261407	0.655188	1.0092
octacosanoic acid (C28 FA)	2.47666	2.7069	2.89037	2.67532	2.90359	3.21101	5.77529	3.2276	0.861217	2.59871	3.00433	3.95104	3.77304	1.93119	1.82897	0.529791	-	0.136396	0.536217	-	-	-	-	0.598377	0.572657	0.495491	0.584576	0.198772	-	0.224157	0.257944	4.18097	0.718316	0.359784	7.60176	2.77749	6.31594	5.94813	5.29137	3.23807	5.55404	7.56953
nonacosanoic acid (C29 FA)	1.07383	1.1028	0.844105	0.879223	0.763679	1.04738	0.788193	0.357534	-	0.801613	0.610499	0.435971	0.328682	-	0.291852	0.0606041	-	-	-	-	-	-	-	-	-	-	-	-	-	-	-	0.345689	-	-	0.655192	0.473318	0.500117	0.423897	0.526022	0.265109	0.33569	0.640103
triacontanoic acid (C30 FA)	2.74576	4.33406	6.21147	4.27326	4.23633	4.15489	3.62256	1.83598	0.158471	2.19699	4.11998	3.95844	4.84422	0.176616	4.49036	0.814419	-	-	0.109933	-	-	-	-	0.284614	0.287512	0.26988	0.354674	0.120666	-	-	-	2.76185	1.16714	0.518337	4.55528	1.32503	4.19116	3.42203	3.83915	2.02825	3.44002	3.12462
henatriacontanoic acid (C31 FA)	0.604568	0.62864	0.680791	0.443798	0.328429	0.320424	0.462048	0.266333	-	0.532039	0.312882	0.100436	0.0980294	-	0.205364	0.046469	-	-	-	-	-	-	-	-	-	-	-	-	-	-	-	0.176776	-	-	0.464201	0.190466	0.336256	0.22135	0.176837	0.175986	0.152148	0.246149
dotriacontanoic acid (C32 FA)	0.967313	2.58387	3.01501	2.13772	1.14181	1.25283	1.61564	0.528037	-	0.870012	0.877787	0.605866	0.383943	-	1.99339	0.821505	-	-	-	-	-	-	-	-	0.0350183	0.208018	-	-	-	-	-	0.701926	0.902099	0.0539004	1.45349	0.669463	0.908088	1.04855	0.926864	0.833833	0.684389	0.93415
tritriacontanoic acid (C33 FA)	-	0.152391	0.145984	0.130565	-	-	0.189438	0.113698	-	0.0805979	-	-	-	-	0.0562569	-	-	-	-	-	-	-	-	-	-	-	-	-	-	-	-	-	-	-	-	-	-	-	-	-	-	-
tetratriacontanoic acid (C34 FA)	-	0.407206	-	0.420864	-	-	0.491974	0.222061	-	0.1164	-	-	-	-	0.172587	0.0688778	-	-	-	-	-	-	-	-	-	-	-	-	-	-	-	-	-	-	-	-	-	-	-	-	-	-
w/a-hydroxy acids
12-hydroxydodecanoic acid (w-C12 OH-FA)	0.0562819	-	-	0.0147783	-	-	0.0383505	0.0523633	-	-	-	-	-	-	-	-	-	-	-	-	-	-	-	-	-	-	-	-	-	-	-	-	-	0.149804	-	0.162213	0.14296	-	0.266538	-	0.152183	0.208436
2-hydroxydodecanoic acid (a-C12 OH-FA)	-	-	-	-	-	-	-	-	-	-	-	-	-	-	-	-	-	-	-	-	-	-	-	-	-	-	-	0.0820142	-	-	-	-	-	-	-	-	-	-	-	-	-	-
2-hydroxypentadecanoic acid (a-C15 OH-FA)	-	-	-	-	-	-	-	-	-	-	-	0.0257237	-	-	-	-	-	-	-	-	-	-	-	-	-	-	-	0.325754	0.23574	0.00973006	0.143601	-	-	-	-	-	-	-	-	-	-	-
14-hydroxytetradecanoic acid (w-C14 OH-FA)	-	0.0341852	-	-	-	-	0.0347953	0.0547516	-	-	-	-	-	-	-	-	-	-	-	-	-	-	-	-	-	-	-	-	-	-	-	0.569071	-	0.321928	0.547014	0.597298	0.466999	0.547803	0.536848	0.688127	0.709015	0.658288
2-hydroxyhexadecanoic acid (a-C16 OH-FA)	-	0.125815	-	-	0.0577746	0.065736	0.0369862	0.0875769	-	0.438337	0.0632251	0.156781	0.1635	-	-	-	-	-	0.0743503	-	-	-	-	-	-	-	-	0.118245	0.157052	0.118538	0.166991	0.314215	-	0.414075	-	-	-	-	-	0.120624	-	0.0922191
2-hydroxyheptadecanoic acid (a-C17 OH-FA)	-	0.0132126	-	-	0.0181164	0.0180448	0.0204772	0.0211201	-	-	-	-	-	-	-	-	-	-	-	-	-	-	-	-	-	-	-	-	-	-	-	-	-	-	-	-	-	-	-	-	-	-
16-hydroxyhexadecanoic acid (w-C16 OH-FA)	0.380678	0.413648	0.216782	0.232892	0.299067	0.284645	0.391749	0.462511	0.0703681	0.232655	-	0.118692	0.210419	0.494754	0.0400757	0.0240634	-	-	-	-	-	-	-	-	-	-	-	0.0308955	-	-	0.104072	1.0014	0.43538	0.532561	1.13215	1.19413	0.93566	0.998411	0.970483	1.25047	1.43829	1.33462
unidentified hydroxy acid (branched?)	-	-	-	-	-	-	-	-	-	-	-	-	-	-	-	-	-	-	-	-	-	-	-	-	-	-	-	-	-	-	-	-	-	-	0.0616845	-	-	-	-	0.0370397	0.0525637	0.0583361
2-hydroxyoctadecanoic acid (a-C18 OH-FA)	-	-	0.0515092	0.0327798	-	0.023237	-	-	-	-	-	-	0.0368163	-	-	-	-	-	-	-	-	-	-	-	-	-	-	0.0603458	0.0610696	-	0.0799427	0.423145	-	0.672713	-	-	-	-	-	0.247042	-	0.208415
2-hydroxyoctadecenoic acid (a-C18:1 OH-FA)	-	-	-	-	-	-	-	-	-	-	-	-	-	-	-	-	-	-	-	-	-	-	-	-	-	-	-	-	-	-	-	0.086121	-	-	-	-	-	-	-	0.0635467	-	0.0349124
17-hydroxyheptadecanoic acid (w-C17 OH-FA)	-	0.0123143	-	-	-	-	-	0.00895306	-	-	-	-	-	0.0136344	-	-	-	-	-	-	-	-	-	-	-	-	-	-	-	-	-	-	-	-	-	-	-	-	-	-	-	-
18-hydroxyoctadecanoic acid (w-C18 OH-FA)	-	0.118597	0.0628619	0.0961322	0.0802357	0.127631	0.0560361	0.086336	-	0.103055	-	0.0339246	0.0347462	0.0450667	-	-	-	-	-	-	-	-	-	-	-	-	-	-	-	-	-	-	-	-	0.0563387	0.0603076	0.035986	0.054165	-	0.0457248	0.0573438	0.0583578
2-hydroxyeicosenoic acid (a-C20:1 OH-FA)	0.0299389	-	-	-	-	-	-	-	-	-	-	-	-	-	-	-	-	-	-	-	-	-	-	-	-	-	-	-	-	-	-	-	-	-	-	-	-	-	-	-	-	-
2-hydroxyeicosanoic acid (a-C20 OH-FA)	-	-	-	0.0156233	-	-	-	-	-	-	-	0.0353772	0.0334087	-	-	-	-	-	-	-	-	-	-	0.258221	0.0585982	0.33773	0.526303	0.0445046	-	-	-	-	-	-	-	-	-	-	-	-	-	-
19-hydroxynonadecanoic acid (w-C19 OH-FA)	-	0.0267582	-	0.0126779	-	0.0115896	0.0204098	0.0134881	-	-	-	-	-	-	-	-	-	-	-	-	-	-	-	-	-	-	-	-	-	-	-	-	-	-	-	-	-	-	-	-	-	-
2-hydroxyheneicosanoic acid (a-C21 OH-FA)	-	-	-	0.0115117	0.0234609	-	-	-	-	-	0.0297408	0.0630105	0.0678397	-	-	-	-	-	-	-	-	-	-	-	-	0.0271207	0.0361959	-	-	-	-	-	-	-	-	-	-	-	-	-	-	-
20-hydroxyeicosanoic acid (w-C20 OH-FA)	0.42939	0.509532	0.221234	0.239053	0.403972	0.325147	0.256448	0.293052	0.0739251	0.191834	-	0.0534857	0.0555522	0.0184262	-	-	-	-	-	-	-	-	-	-	-	0.0696561	0.0752431	-	-	-	-	0.118657	0.0653416	0.0817624	0.179867	0.21494	0.160257	0.128929	-	0.152459	0.189755	0.151337
2-hydroxydocosanoic acid (a-C22 OH-FA)	0.223324	0.284549	0.169225	0.190179	0.196268	0.180614	0.0898019	0.142843	-	-	0.472162	0.649465	0.905769	0.0627485	-	-	0.062061	0.0620492	0.0998317	-	-	-	-	0.0816681	0.0544763	0.182073	0.358608	0.102674	0.0608637	0.125177	0.0674451	0.0593084	-	0.276439	-	-	-	-	-	-	-	-
21-hydroxyheneicosanoic acid (w-C21 OH-FA)	0.0724216	0.0825162	0.021739	0.0424876	0.0503443	0.0445757	0.0431964	0.0770194	-	-	-	-	-	-	-	-	-	-	-	-	-	-	-	-	-	-	-	-	-	-	-	-	-	-	-	-	-	-	-	-	0.0287491	-
2-hydroxytricosanoic acid (a-C23 OH-FA)	0.184193	0.286469	0.171744	0.157764	0.160358	0.164704	0.0730397	0.0962342	-	-	0.255583	0.390095	0.556368	0.0314716	-	-	0.0373467	-	0.0309183	-	-	-	-	-	-	0.0506391	0.0651956	0.0428946	0.0416393	-	0.0638106	-	-	-	-	-	-	-	-	-	-	-
22-hydroxydocosanoic acid (w-C22 OH-FA)	2.77661	3.50391	2.06839	2.12931	2.05937	1.85682	1.39764	1.53633	0.722468	0.754829	-	-	0.1731	0.0763708	0.0830483	0.0153988	-	-	-	-	-	-	-	-	-	0.087909	0.317761	0.324089	0.0749551	-	0.0919466	0.634587	0.162349	0.265727	1.17366	1.25827	0.58288	0.594338	0.358345	0.626975	0.958153	0.913873
2-hydroxytetracosanoic acid (a-C24 OH-FA)	0.73638	1.16002	0.634819	0.667694	0.565513	0.54965	0.259723	0.39096	0.323837	1.63854	0.897955	1.20524	1.68356	0.127047	0.059127	0.130961	0.13348	0.116644	0.213723	-	-	0.0712834	-	0.163105	0.0581461	0.277305	0.719829	0.142572	0.0981388	0.234357	0.122183	0.123537	0.178252	0.579222	-	-	0.0876576	-	-	0.0588108	0.0619703	0.108242
23-hydroxytricosanoic acid (w-C23 OH-FA)	0.0703074	0.132523	0.0726318	0.0794061	0.0620523	0.0620058	0.0721182	0.0623557	-	-	-	-	-	-	-	-	-	-	-	-	-	-	-	-	-	-	0.0158065	-	-	-	-	-	-	-	-	-	-	-	-	-	-	0.0409365
2-hydroxypentacosanoic acid (a-C25 OH-FA)	0.116426	0.17555	0.137965	0.103093	0.10955	0.0922505	0.0606003	0.060719	-	0.222209	0.159162	0.228432	0.341039	-	-	-	-	-	0.0111696	-	-	-	-	-	-	0.0555891	0.133603	0.0539776	0.0537778	-	0.0621764	-	-	-	-	-	-	-	-	-	-	-
24-hydroxytetracosanoic acid (w-C24 OH-FA)	-	2.25853	0.90821	0.972465	1.27332	1.1967	1.58209	1.32179	0.244405	0.472555	0.0709928	-	-	-	0.118591	0.0547744	-	-	0.0406525	-	-	-	-	-	-	0.221384	0.875992	0.293227	0.246249	-	0.472792	0.631264	0.183189	0.14515	1.75547	1.35691	0.79235	0.640142	0.286382	0.582644	0.969796	1.49129
2-hydroxyhexacosanoic acid (a-C26 OH-FA)	0.0403904	0.0712145	0.083855	0.0974832	0.0858024	0.0392219	-	-	-	-	0.105145	0.201746	0.301715	-	-	-	-	-	-	-	-	-	-	-	-	0.0281203	0.123281	-	-	-	-	-	-	0.119337	-	-	-	-	-	-	-	-
25-hydroxypentacosanoic acid (w-C25 OH-FA)	-	0.110447	0.0608354	0.0641821	-	-	-	-	-	-	-	-	-	-	-	-	-	-	-	-	-	-	-	-	-	-	0.0259608	-	-	-	-	-	-	-	-	-	-	-	-	-	-	-
26-hydroxyhexacosanoic acid (w-C26 OH-FA)	0.564008	0.694692	0.249941	0.230748	0.340437	0.353646	0.651872	0.553375	-	0.167816	-	-	-	-	-	-	-	-	-	-	-	-	-	-	-	0.058151	0.268275	0.207632	0.143983	-	0.269495	0.533706	-	-	1.00136	0.473075	0.39949	0.257168	0.187279	0.494166	0.565417	0.644198
28-hydroxyoctacosanoic acid (w-C28 OH-FA)	-	-	-	0.0621401	-	-	0.208349	0.147771	-	-	-	-	-	-	-	-	-	-	-	-	-	-	-	-	-	-	-	-	-	-	-	-	-	-	0.747995	-	0.272923	-	-	0.453015	0.382386	0.540675
30-hydroxytriacontanoic acid (w-C30 OH-FA)	-	-	-	-	-	-	-	-	-	-	-	-	-	-	-	-	-	-	-	-	-	-	-	-	-	-	-	-	-	-	-	-	-	-	-	-	-	-	-	-	-	0.396922
branched fatty acids
12-methyltridecanoic acid (iso-C14 FA)	-	-	-	0.0772219	0.115694	0.103014	-	0.0730342	-	-	-	-	-	-	-	-	-	-	-	-	-	-	-	-	-	-	-	-	-	-	-	-	-	-	-	-	-	0.228042	-	-	0.129265	0.0921598
13-methyltetradecanoic acid (iso-C15 FA)	0.357829	0.303948	0.231996	0.318924	0.97376	0.850956	0.354839	0.665333	-	0.0808485	-	-	0.184955	-	-	-	0.273638	-	0.0432874	0.403197	0.328193	0.111884	-	-	-	-	-	0.958587	-	-	-	0.295968	0.628379	0.164054	0.180735	0.0149279	0.118715	0.26931	0.206582	0.186349	0.160253	0.191331
12-methyltetradecanoic acid (anteiso-C15 FA)	0.180432	0.17421	0.11705	0.167016	0.394831	0.338256	0.136943	0.300351	-	0.0792765	-	0.0816643	0.10404	0.0849348	-	-	0.164051	-	-	0.363972	0.243899	0.0887185	-	-	-	-	-	0.785227	-	-	-	0.852875	1.27098	0.728936	0.262224	0.0397061	0.738809	0.763035	0.265315	0.76187	0.42849	0.40915
14-methylpentadecanoic acid (iso-C16 FA)	0.295481	0.362003	0.342158	0.510615	0.387396	0.331207	0.118787	0.281931	0.5581	0.361203	-	0.0397402	0.0416757	-	-	-	0.184369	-	0.0440114	0.121895	0.255537	-	0.253401	-	-	0.0535431	-	0.265505	0.263589	0.0924469	0.201875	0.202203	0.381363	-	-	-	-	-	-	0.0974586	0.0543056	-
10-methyl-hexadecanoic acid	0.0854553	0.150829	0.078643	0.0770286	0.196209	0.124555	0.0642191	0.123975	-	0.380888	-	-	-	-	-	-	-	-	-	-	-	-	-	-	-	-	-	-	-	-	-	-	-	-	-	-	-	-	-	-	-	-
15-methylhexadecanoic acid (iso-C17 FA)	0.12873	0.212967	0.0837985	0.176064	0.355669	0.279259	0.114847	0.206828	-	0.307602	-	-	-	-	-	-	-	-	-	0.108528	0.59973	0.160534	0.804086	-	-	-	0.180955	0.421842	0.326648	0.105512	0.14348	0.00956214	0.10481	-	-	0.0434851	-	-	0.0291994	-	-	0.0431474
14-methylhexadecanoic acid (anteiso-C17 FA)	0.147093	0.239998	0.0964775	0.156076	0.206953	0.191609	0.106156	0.192113	-	0.68866	-	-	-	-	-	-	-	-	-	0.165607	0.55729	0.137668	0.766173	-	-	-	0.181484	0.755933	0.745655	0.276245	-	0.0128485	0.10562	-	-	0.0600474	-	-	0.0230445	-	-	-
16-methylheptadecanoic acid (iso-C18 FA)	0.0478921	-	-	0.0439104	0.0417759	0.0433761	-	0.0365976	-	0.369957	-	-	-	-	-	-	-	-	-	-	-	-	0.0675598	-	-	-	-	0.135974	-	-	-	-	-	0.121193	-	-	-	-	-	-	-	-
17-methyloctadecanoic acid (iso-C19 FA)	0.112717	0.171315	0.100537	0.142949	0.172796	0.177802	0.0781787	0.09251	-	-	-	-	-	-	-	-	-	-	-	-	-	-	-	-	-	-	-	0.20889	0.824246	-	0.308472	-	-	-	-	-	-	-	-	-	-	-
17-methyloctadecanoic acid (anteiso-C19 FA)	-	-	-	-	-	-	-	-	-	-	-	-	-	-	-	-	-	-	-	-	-	-	-	-	-	-	-	-	-	-	-	-	-	-	-	-	-	-	-	-	-	-
18-methylnonadecanoic acid (iso-C20 FA)	-	-	-	-	-	-	-	-	-	-	-	-	-	-	-	-	-	-	-	-	-	-	-	-	-	-	-	-	-	-	-	-	-	-	-	-	-	-	-	-	-	0.0730037
20-methylheneicosanoic acid (iso-C22 FA)	-	-	-	-	-	-	-	-	-	-	-	-	-	-	-	-	-	-	-	-	-	-	-	-	-	-	-	0.0301097	-	-	-	-	-	-	-	-	-	-	-	-	-	-
22-methyldocosanoic acid (iso-C24 FA)	-	-	-	-	-	-	-	-	-	-	-	-	-	-	-	-	-	-	-	-	-	-	-	-	-	-	-	0.068583	0.126934	0.19443	0.0922438	-	-	-	-	-	-	-	-	-	-	-
methyltetracosanoic acid (iso/anteiso-C25 FA)	-	-	-	-	-	-	-	-	-	-	-	-	-	-	-	-	-	-	-	-	-	-	-	-	-	-	-	0.0544957	-	0.212194	0.117885	-	-	-	-	-	-	-	-	-	-	-
unsaturated fatty acids
cis-9-tetradecenoic acid (C14:1 (cis-9) MUFA)	-	-	-	-	-	-	-	-	-	-	-	-	-	-	-	-	-	-	-	-	-	-	-	-	-	0.230807	-	-	-	-	-	-	-	-	-	-	-	-	-	-	-	-
cis-10-pentadecenoic acid (C15:1 (cis-10) MUFA)	-	-	-	-	-	-	-	-	-	-	-	-	-	-	-	-	-	-	-	-	-	-	-	-	-	0.241363	0.0602257	-	-	-	-	-	-	-	-	-	-	-	-	-	-	-
hexadecatrienoic acid (C16:3 PUFA) isomer	-	-	-	-	-	-	-	-	-	-	-	-	-	-	-	-	1.25195	-	-	-	-	-	-	-	-	-	-	-	-	-	-	-	-	-	-	-	-	-	-	-	-	-
hexadecatrienoic acid (C16:3 PUFA)	-	-	-	-	-	-	-	-	-	-	-	-	-	-	-	-	1.19797	0.385804	0.125278	0.884162	0.497394	0.254453	0.572104	-	-	-	-	-	-	-	-	-	-	-	-	-	-	-	-	-	-	-
hexadecadienoic acid (C16:2 PUFA)	-	-	-	-	-	-	-	-	-	-	-	-	-	-	-	-	-	-	-	-	-	-	0.446602	-	-	-	-	-	-	-	-	-	-	-	-	-	-	-	-	-	-	-
hexadecatrienoic acid (C16:3 PUFA) isomer	-	-	-	-	-	-	-	-	-	-	-	-	-	-	-	-	0.213143	-	-	-	-	-	1.10841	-	-	-	-	-	-	-	-	-	-	-	-	-	-	-	-	-	-	-
hexadecenoic acid (C16:1 MUFA) isomer	-	-	-	0.322342	0.144514	-	-	-	-	-	-	-	-	-	-	-	0.243944	-	-	-	0.455649	-	0.584632	-	-	0.0915365	-	0.794659	0.585669	0.47316	0.384828	-	-	-	-	-	-	-	-	-	-	-
cis-9-hexadecenoic acid (C16:1 (cis-9) MUFA)	1.8472	1.77244	2.24776	1.83351	3.07885	2.15171	1.58543	2.28091	1.07313	0.25253	0.554152	0.486369	0.60783	1.0247	-	-	18.1783	3.78197	0.592648	10.7224	15.8559	39.5624	6.07651	-	0.0918162	12.7578	-	6.05748	5.08707	0.261125	3.9406	-	-	-	-	-	-	-	-	-	-	-
hexadecenoic acid (C16:1 MUFA) isomer	3.69161	3.10926	6.55931	5.85678	1.8994	1.58189	0.515284	0.971996	2.92111	1.8288	0.328133	0.0981457	0.146551	-	-	-	0.335612	0.55469	0.380733	-	1.01274	0.261804	0.566066	2.82157	0.534035	0.211279	-	0.705891	0.557644	-	0.625184	-	-	-	-	-	-	-	-	-	-	-
cis-10-heptadecenoic acid (C17:1(cis-10) MUFA)	-	-	-	-	-	-	-	-	-	-	-	-	-	-	-	-	-	-	-	-	-	-	-	-	-	-	-	4.54178	2.25047	0.0914514	1.53067	-	-	-	-	-	-	-	-	-	-	-
octadecatrienoic acid (C18:3 PUFA) isomer	0.104338	-	-	0.0880873	0.0361379	-	-	0.0323365	-	-	-	-	-	-	-	-	0.124479	0.277225	-	0.317883	0.289759	-	0.788809	-	-	-	-	-	-	-	-	-	-	-	-	-	-	-	-	-	-	-
octadecatetraenoic acid (C18:4 PUFA)	-	-	-	-	-	-	-	-	-	-	-	-	-	-	-	-	-	-	-	0.736965	0.949761	-	2.09206	-	-	-	-	-	-	-	-	-	-	-	-	-	-	-	-	-	-	-
octadecadienoic acid (C18:2 PUFA)	6.71751	4.00497	5.72926	4.78197	3.84223	2.96604	6.07136	4.65344	5.41623	4.74186	8.17812	8.56858	7.1432	17.3078	8.11593	7.74293	3.46027	9.55084	12.8136	11.1257	5.52929	1.59238	9.62878	8.44806	11.4816	21.0667	26.988	4.38712	7.76294	12.0152	5.50823	-	-	-	-	-	-	-	-	-	-	-
octadecatrienoic acid (C18:3 PUFA)	-	-	-	0.459698	-	-	-	-	-	-	-	2.24924	1.68708	-	19.3885	21.9443	5.51372	23.0232	22.5293	7.05574	7.80979	1.75872	17.6203	56.2488	38.8695	12.6885	16.3661	-	-	-	-	-	-	-	-	-	-	-	-	-	-	-
cis-9-octadecenoic acid (C18:1 (cis-9) MUFA)	17.5065	13.7403	9.17924	6.50654	15.0349	11.653	21.8147	21.9248	9.03792	17.955	5.38902	5.08612	5.22921	18.4908	1.58736	2.74222	8.13204	3.47732	0.587338	7.05574	2.51339	8.40615	5.81883	-	0.30283	0.694518	0.539873	11.1573	12.0336	16.1911	11.2116	0.21295	-	-	-	0.527255	0.200414	-	0.321488	0.331191	0.121742	0.149189
trans-9-octadecenoic acid (C18:1 (tr-9) MUFA)	0.833662	1.0823	0.567462	0.684446	1.37323	0.892684	0.451004	0.810321	1.16345	1.73982	0.91151	0.919376	0.98127	0.871183	0.347421	0.586239	3.73106	1.40948	-	2.23302	2.26463	2.24401	1.54628	-	-	-	-	9.95014	11.2175	2.84161	9.28463	-	-	-	-	-	-	-	-	-	-	-
nonadecenoic acid (C19:1 MUFA)	-	-	-	-	0.21474	0.159233	-	-	-	-	-	-	-	-	-	-	-	-	-	-	-	-	-	-	-	-	-	1.6857	1.9635	-	0.982259	-	-	-	-	-	-	-	-	-	-	-
eicosatetraenoic acid (C20:4 PUFA)	-	-	-	-	-	-	-	-	-	-	-	-	-	-	-	-	0.265645	0.075533	0.114433	2.71745	1.97504	0.2404	3.24508	-	-	0.0713828	-	-	-	-	-	-	-	-	-	-	-	-	-	-	-	-
eicosapentaenoic acid (C20:5 PUFA, EPA)	-	-	-	0.137117	-	-	-	-	-	-	-	-	-	-	-	-	2.16266	0.987531	0.19473	3.27432	3.88147	0.786244	9.20657	-	-	0.661538	-	0.154355	0.259694	-	0.298995	-	-	-	-	-	-	-	-	-	-	-
eicosatetraenoic acid (C20:4 PUFA) isomer	-	-	-	-	-	-	-	-	-	-	-	-	-	-	-	-	-	-	-	-	-	-	0.538468	-	-	-	-	-	-	-	-	-	-	-	-	-	-	-	-	-	-	-
eicosadienoic acid (C20:2 PUFA)	-	-	-	0.029284	-	-	-	-	-	-	-	-	-	-	-	-	-	-	0.12298	1.38331	0.543672	-	1.29871	-	-	0.11027	0.184499	-	-	-	-	-	-	-	-	-	-	-	-	-	-	-
eicosatrienoic acid (C20:3 PUFA)	-	-	-	-	-	-	-	-	-	-	-	-	-	-	-	-	-	-	-	1.52517	0.24705	-	-	-	-	-	-	-	-	-	-	-	-	-	-	-	-	-	-	-	-	-
cis-11-eicosenoic acid (C20:1 (cis-11) MUFA)	-	0.146983	-	0.0778515	0.0977687	0.0700811	0.0890918	0.10247	-	0.145621	0.100978	0.057345	0.0521655	-	0.080377	-	-	0.187595	0.0893032	0.124053	1.25601	-	1.38483	-	0.0522723	1.23934	3.41744	0.4238	0.28297	0.319345	0.381546	-	-	-	-	-	-	-	-	-	-	-
eicosenoic acid (C20:1 MUFA) isomer	-	-	-	-	-	-	-	-	-	-	-	-	-	-	-	-	-	-	-	-	1.09869	-	0.556766	-	-	-	0.056643	-	-	-	-	-	-	-	-	-	-	-	-	-	-	-
eicosatrienoic acid (C20:3 PUFA) isomer	-	-	-	-	-	-	-	-	-	-	-	-	-	-	-	-	-	-	-	-	-	-	1.14331	-	-	-	-	-	-	-	-	-	-	-	-	-	-	-	-	-	-	-
eicosadienoic acid (C20:2 PUFA) isomer	-	-	-	-	-	-	-	-	-	-	-	-	-	-	0.110952	-	-	-	-	-	-	-	-	-	-	-	0.069831	-	-	-	-	-	-	-	-	-	-	-	-	-	-	-
docosahexaenoic acid (C22:6 PUFA) isomer	-	-	-	-	-	-	-	-	-	-	-	-	-	-	-	-	-	-	-	0.282623	1.12743	-	0.52385	-	-	-	-	-	-	-	-	-	-	-	-	-	-	-	-	-	-	-
docosahexaenoic acid (C22:6 PUFA, DHA)	-	-	-	-	-	-	-	-	-	-	-	-	-	-	-	-	0.243331	0.22577	0.0783055	1.90104	2.36831	-	2.26652	-	-	-	-	-	-	-	-	-	-	-	-	-	-	-	-	-	-	-
docosahexaenoic acid (C22:6 PUFA) isomer	-	-	-	-	-	-	-	-	-	-	-	-	-	-	-	-	-	-	-	-	-	-	0.603228	-	-	-	-	-	-	-	-	-	-	-	-	-	-	-	-	-	-	-
docosadienoic acid (C22:2 PUFA) isomer	-	-	-	-	-	-	-	-	-	-	-	-	-	-	-	-	-	-	-	-	-	-	0.420609	-	-	-	-	-	-	-	-	-	-	-	-	-	-	-	-	-	-	-
docosadienoic acid (C22:2 PUFA)	-	-	-	-	-	-	-	-	-	-	-	-	-	-	-	-	-	-	-	-	-	-	0.237674	-	-	-	-	-	-	-	-	-	-	-	-	-	-	-	-	-	-	-
cis-13-docosenoic acid (C22:1 (cis-13) MUFA)	-	0.154868	-	0.156535	0.29125	-	0.0733531	-	0.462754	-	0.171977	-	-	-	-	-	-	-	0.575483	0.497948	0.396995	-	0.118221	-	-	-	0.402119	-	0.174435	0.0619299	0.230563	-	-	-	-	-	-	-	-	-	-	-
cis-15-tetracosanoic acid (C24:1 (cis-15) MUFA)	0.112215	-	0.0913213	0.171304	0.183188	0.0705083	0.0845573	-	-	-	-	0.178512	-	0.202678	-	-	-	0.35082	-	-	0.0768511	0.0484118	-	-	-	-	0.184738	0.871061	0.412578	-	-	-	-	-	-	-	-	-	-	-	-	-
n-alcohols
dodecanol (C12 OH)	-	-	-	-	-	0.0154347	-	-	-	-	-	-	-	-	-	-	-	-	-	-	-	-	-	-	-	-	-	-	-	-	-	0.196591	0.173901	0.296172	0.165314	-	0.180536	0.20986	0.233972	0.170156	0.105848	0.0836709
tridecanol (C13 OH)	-	-	-	0.0210345	-	-	-	-	-	-	-	-	-	-	-	-	-	-	-	-	-	-	-	-	-	-	-	-	-	-	-	0.0895567	0.174565	0.10876	0.0678435	-	-	0.139282	0.111763	0.0357963	0.0480754	-
tetradecanol (C14 OH)	-	-	-	0.0180323	0.0559366	0.0517598	-	-	-	-	-	-	-	-	-	-	-	-	0.0224259	-	0.0300778	-	-	-	-	-	-	0.186392	-	-	-	0.260765	0.701204	0.304385	0.147251	-	0.181616	0.313531	0.227649	0.187276	0.174153	0.123963
pentadecanol (C15 OH)	-	-	-	0.0300365	0.0366567	0.0265237	-	-	-	-	-	-	-	-	-	-	-	-	-	-	-	-	-	-	-	-	-	-	-	-	-	0.174199	-	-	0.184416	0.0324297	-	-	-	-	-	-
hexadecanol (C16 OH)	0.0986115	0.0776267	0.0606703	0.101217	0.110528	0.129498	0.0345995	0.0982939	0.19383	0.216678	-	0.0657033	0.0310683	0.328214	-	-	0.0957199	0.0710618	0.0730053	0.0494059	0.0930906	0.226254	0.00866018	-	0.0134335	-	0.0201929	0.40577	0.426039	0.430647	0.423538	0.448666	0.610022	-	-	0.173524	0.168715	0.274443	0.307889	0.296417	0.157389	0.198854
heptadecanol (C17 OH)	0.0326426	0.0400335	0.0274878	0.0428441	0.0509758	0.0204222	0.0102551	0.0215678	-	-	-	-	0.0199751	-	-	-	-	-	-	-	0.120559	-	-	-	-	-	-	-	-	-	-	-	-	-	-	0.0937599	-	-	-	0.0830372	0.0524268	0.0690865
octadecanol (C18 OH)	0.464801	0.564426	0.277428	0.348346	0.495665	0.54604	0.352901	0.704735	0.389224	0.539294	0.145948	0.13848	0.107681	1.0549	0.0729977	-	0.0969902	0.0727969	0.0597401	-	-	-	-	0.0830247	0.179582	-	0.0489393	0.795665	0.958302	1.52934	1.52703	0.429095	0.0567718	0.490124	0.284929	0.250588	0.278197	0.248978	0.389525	0.280626	0.213309	0.251427
nonadecanol (C19 OH)	0.0496438	0.06859	0.0128267	0.0841692	0.0716085	0.0444001	0.0189181	0.0453532	-	0.124633	-	-	-	0.0169152	-	-	-	-	-	-	-	-	-	-	-	-	-	0.0538105	-	0.0779022	0.0578822	0.0849326	0.122019	0.117263	0.0368083	0.0896052	0.0698506	0.0674334	0.0659908	0.0747655	0.051931	0.0555844
eicosanol (C20 OH)	0.672204	0.745591	0.483623	0.641102	0.430865	0.451997	0.696057	1.14804	0.761694	0.724139	0.0989484	0.071104	0.073889	2.28471	0.0361759	-	0.0678304	-	-	-	0.0310958	-	-	0.0685319	0.118112	0.0438684	0.0470769	0.550513	0.487584	1.56942	1.00187	0.819788	1.00887	1.00707	0.568529	0.567733	0.545206	0.526888	0.539656	0.654111	0.537558	0.568117
heneicosanol (C21 OH)	0.104491	0.193811	0.0757328	0.113554	0.119206	0.147734	0.0438129	0.12508	0.283789	0.203134	-	-	-	0.0580773	0.0373806	-	-	-	-	-	-	-	-	-	-	-	-	0.260926	-	0.0483527	0.126062	0.156594	0.21937	0.218956	0.126181	0.126456	0.11674	0.125096	0.118655	0.101682	0.122745	0.115365
docosanol (C22 OH)	2.52029	2.88569	1.76931	2.71038	1.86875	2.47693	1.91319	2.79269	4.67289	3.09313	0.671709	0.447339	0.433359	1.04352	0.0549158	0.105443	0.101177	0.0294118	0.0558056	-	-	-	-	0.0913536	0.139607	0.133377	0.154276	1.24146	0.452829	1.21073	0.715278	2.74546	3.47876	3.96157	2.23085	2.25492	2.03225	2.28507	2.05215	2.59827	2.26562	2.14084
tricosanol (C23 OH)	0.157146	0.213392	0.122798	0.212989	0.191192	0.243768	0.106581	0.156472	0.710744	0.411818	0.0305462	0.0493258	0.0454749	0.0327016	0.0107935	-	-	0.0354083	0.132732	-	-	-	-	-	-	0.0425005	0.0404994	-	0.0315478	0.0442093	0.0536618	0.375416	0.636784	0.703924	0.357966	0.426687	0.369683	0.363634	0.401172	0.449142	0.374556	0.353562
tetracosanol (C24 OH)	2.55691	3.18315	2.23676	3.76353	3.48601	4.91728	1.38379	1.901	9.0839	6.76906	0.681309	1.22963	1.363	0.361563	0.650657	0.489627	0.059258	0.167231	0.813831	-	-	-	-	0.0671363	0.0568706	0.0939734	0.0969933	0.248174	0.131356	0.526501	0.274158	4.13862	6.64302	6.59564	3.7704	3.74586	3.77907	3.81196	3.87534	4.28616	3.46755	3.41576
pentacosanol (C25 OH)	0.179508	0.225108	0.17282	0.279272	0.284016	0.350806	0.122346	0.140356	1.05316	0.638525	0.0482836	0.0502909	0.0495966	0.0195344	0.115941	0.0602737	-	0.02713	0.24169	-	-	-	-	-	0.0142808	0.0595048	-	-	-	-	-	0.393761	0.688665	0.7232	0.368746	0.349328	0.380344	0.378954	0.408552	0.429252	0.390588	0.375019
hexacosanol (C26 OH)	1.52557	2.18081	1.76628	2.97276	1.21923	1.87409	3.24256	3.91128	5.08966	4.08661	0.269903	0.132728	0.161628	0.160623	16.227	14.571	0.0781656	0.11461	0.466823	-	-	-	-	0.410872	0.475816	0.314925	0.0451052	0.0786458	0.044722	0.223299	-	3.86807	7.26249	6.82645	3.80325	3.42662	3.90023	3.96226	4.15651	4.66511	3.81824	3.84474
heptacosanol (C27 OH)	0.111785	0.187231	0.100959	0.217734	0.314541	0.403926	0.323234	0.36346	0.290702	-	-	0.0969325	0.0835083	0.0606297	0.171641	0.0350424	-	-	0.0749854	-	-	-	-	-	-	0.0216548	-	-	-	-	-	0.373802	0.678644	0.603067	0.421797	0.221483	0.466218	0.272869	-	0.258099	0	0.360863
octacosanol (C28 OH)	0.811554	1.28491	1.07413	1.85784	0.981097	1.53291	3.44457	4.29531	21.2985	1.60204	0.292946	0.194768	0.168548	0.839981	1.81367	0.635081	0.196765	-	0.32641	-	-	-	-	4.53523	4.45786	0.45498	0.0458529	0.189702	-	-	-	3.93225	7.28702	7.4285	3.90476	2.59818	3.82224	4.47024	4.26436	5.82584	4.99164	4.90386
nonacosanol (C29 OH)	0.236594	0.300754	0.676008	0.439244	0.425985	0.673024	0.19714	0.298141	-	-	-	0.172858	0.0873221	-	0.313663	0.0696764	-	-	-	-	-	-	-	0.1055	0.13521	-	-	-	-	-	-	0.310562	0.972674	0.488443	0.362419	0.302762	0.318562	0.318882	0.30108	0.340052	0.351002	0.328186
triacontanol (C30 OH)	1.44665	2.28068	3.28437	1.81774	1.66406	3.19288	2.08947	1.89003	2.37362	1.26285	0.8721	0.458115	0.269531	0.0534843	0.491174	0.210199	0.60343	-	0.146789	-	-	-	-	7.13466	20.2938	0.260031	0.0644813	0.0960236	-	-	-	1.90337	5.45141	3.24882	2.90741	2.24228	2.87148	2.50014	2.76493	2.52203	1.83813	2.43655
henatriacontanol (C31 OH)	0.159294	0.217165	0.517313	0.205969	0.139879	0.236411	0.103311	0.11535	-	-	-	0.0823311	-	-	-	-	-	-	-	-	-	-	-	-	0.0452831	-	-	-	-	-	-	0.0970501	0.560023	0.220318	0.220747	0.171807	0.164788	0.105261	0.168187	0.0929431	0.144705	0.130114
dotriacontanol (C32 OH)	0.580334	0.803145	1.69042	1.05868	0.484155	0.881851	0.322711	0.656521	1.38462	0.479384	-	0.209688	-	-	0.155277	0.0931708	-	-	-	-	-	-	-	-	0.0871042	-	-	-	-	-	-	0.384257	2.2741	0.790377	0.718583	0.444295	1.01228	0.629751	0.866877	0.440053	0.563889	0.547841
tritriacontanol (C33 OH)	-	-	-	0.0699083	-	-	0.0497636	-	-	-	-	-	-	-	-	-	-	-	-	-	-	-	-	-	-	-	-	-	-	-	-	-	0.180257	-	-	-	0.0244182	-	-	-	-	-
tetratriacontanol (C34 OH)	-	-	-	0.206495	-	-	0.120365	-	-	-	-	-	-	-	-	-	-	-	-	-	-	-	-	-	-	-	-	-	-	-	-	-	0.70045	-	-	-	0.0466693	-	-	-	-	-
n-alkanes/alkenes
nonadecane (n-C19)	-	-	-	-	-	-	-	-	-	-	-	-	-	-	-	-	-	-	-	-	-	-	-	-	-	-	-	-	-	-	-	-	-	-	-	0.0720639	-	-	-	-	-	-
heneicoane (n-C21)	-	-	-	-	-	-	-	-	-	0.189409	-	-	-	-	-	-	-	-	-	-	-	-	-	-	-	-	-	-	-	-	-	-	-	0.178976	-	-	-	-	-	-	-	0.0922069
triacosene (n-C23:1)	-	-	-	-	-	-	-	-	-	-	-	-	-	-	-	-	-	-	-	-	-	-	-	-	-	-	-	-	-	-	-	-	-	-	-	-	-	-	-	-	-	0.0413477
tricosane (n-C23)	0.0526974	-	-	0.041831	0.0575326	0.039888	0.0275905	0.0249975	-	0.524877	0.0537609	0.0555209	0.0787098	0.0421807	0.0967601	0.0905624	-	0.212277	0.257424	-	-	-	-	0.0100891	0.0150033	-	-	-	-	-	-	-	-	0.145436	-	0.16482	0.0255015	-	0.118294	0.0973073	0.067341	0.109906
tetracosane (n-C24)	0.0117083	-	-	0.0132989	-	-	-	-	-	0.151433	-	0.0373118	0.0371697	-	0.0416457	-	-	-	0.0243982	-	-	-	-	-	-	-	-	-	-	-	-	-	-	-	-	-	-	-	-	-	-	0.0164149
pentacosene (n-C25:1)	-	-	-	-	-	-	-	-	-	-	-	-	-	-	-	-	-	-	-	-	-	-	-	-	-	-	-	-	-	-	-	-	-	-	-	-	0.0159426	-	-	-	-	0.0834768
pentacosane (n-C25)	0.0528662	-	-	0.0946457	0.103485	0.142523	0.0840851	0.133829	0.256282	-	0.152867	0.33779	0.395766	0.222902	0.297382	-	-	0.262156	0.283982	-	-	-	-	0.0453485	0.045042	-	-	-	-	-	-	0.0713899	0.186255	0.245577	-	0.166242	0.0552056	-	0.174203	0.180855	0.137635	0.157723
hexacosane (n-C26)	0.0197542	0.0199654	-	0.0187935	0.0422431	0.0426387	-	0.0321748	-	0.18655	0.0442909	0.056009	0.0588923	0.0490892	0.143857	-	-	-	0.0258986	-	-	-	-	-	-	-	-	-	-	-	-	0.0164304	-	-	-	-	0.0241551	-	-	-	-	0.0149049
heptacosene (n-C27:1)	-	-	-	-	-	-	-	-	-	-	-	-	-	-	0.0381567	-	-	0.027162	0.014631	-	-	-	-	-	-	-	-	-	-	-	-	-	-	-	-	-	-	-	-	-	-	0.0307409
heptacosane (n-C27)	0.246621	0.180823	0.107367	0.178678	0.474562	0.362923	0.870336	0.893898	0.428527	0.923835	0.908617	0.825643	0.887377	4.87202	0.411496	0.0760065	-	0.159428	0.264101	-	-	-	-	0.06192	0.0929976	-	-	-	-	-	-	0.252188	0.524752	0.473499	0.192214	0.587534	0.236203	0.215348	0.314259	0.324373	0.216662	0.247976
octacosane (n-C28)	0.0960787	0.0412018	-	0.0603374	0.190475	0.129782	0.0323449	0.030304	-	-	0.151108	-	0.209956	-	0.122721	-	-	-	0.0224667	-	-	-	-	-	-	-	-	-	-	-	-	0.0239931	-	-	-	-	-	-	-	-	-	0.0260811
nonacosene (n-C29:1)	-	-	-	-	-	-	-	-	-	-	-	-	-	-	-	-	-	0.101356	0.0642211	-	-	-	-	-	-	-	-	-	-	-	-	-	-	-	-	-	-	-	-	-	-	-
nonacosane (n-C29)	1.10143	0.897018	0.508457	0.852505	1.97907	1.41887	0.571945	0.60441	1.15555	1.46532	4.24549	2.51676	2.53323	0.255514	1.88483	1.14374	0.0972355	0.0711911	0.22975	-	-	-	-	0.0916676	0.163478	-	-	-	-	-	-	0.460131	1.54837	1.00076	0.48586	1.30596	0.55206	0.550673	0.772274	0.664035	0.449756	0.430186
triacontane (n-C30)	0.063486	-	-	0.0650701	0.139192	0.0688343	-	0.0432599	-	-	0.0906822	-	0.0949471	-	0.11806	-	-	-	-	-	-	-	-	-	-	-	-	-	-	-	-	-	-	-	-	-	-	-	0.0440378	-	-	0.0177819
hentriacontane (n-C31)	0.828101	0.561558	0.457757	0.598721	1.01824	0.629817	1.09474	0.937643	1.19842	1.6418	1.00881	0.729162	0.698442	-	7.37801	6.97564	-	-	0.0202352	-	-	-	-	0.0699505	0.0370623	-	-	-	-	-	-	0.270004	1.40392	0.821047	0.329267	1.20049	0.519766	0.406891	0.737204	0.613375	0.272956	0.239608
tritriacontane (n-C33)	0.252397	-	0.218005	0.154813	-	-	-	0.808538	0.41574	-	-	-	-	-	0.207493	0.254943	-	-	-	-	-	-	-	-	-	-	-	-	-	-	-	-	-	-	-	-	-	-	0.266569	-	-	0.102174
methyl ketones
heneicosanone (C21 methyl ketone)	-	-	-	-	-	-	-	-	-	-	-	-	-	-	-	-	-	-	-	-	-	-	-	-	-	-	-	-	-	-	-	-	0.0157167	0.0105833	-	-	-	-	-	-	-	-
tricosanone (C23 methyl ketone)	-	-	-	-	-	-	-	-	-	-	-	-	-	-	-	-	-	-	-	-	-	-	-	-	-	-	-	-	-	-	-	0.03426	0.0298686	0.0267095	-	0.0865091	0.010242	-	-	0.0214299	-	0.0280639
tetracosanone (C24 methyl ketone)	-	-	-	-	-	-	-	-	-	-	-	-	-	-	-	-	-	-	-	-	-	-	-	-	-	-	-	-	-	-	-	-	-	-	-	-	-	-	-	0.00328906	-	-
pentacosanone (C25 methyl ketone)	-	-	-	-	-	-	-	-	-	-	-	-	-	-	-	-	-	-	-	-	-	-	-	-	-	-	-	-	-	-	-	0.0615528	0.0811623	0.302655	-	0.241308	0.0227325	0.0585043	0.0242969	0.129357	0.140483	0.116405
hexacosanone (C26 methyl ketone)	-	-	-	-	-	-	-	-	-	-	-	-	-	-	-	-	-	-	-	-	-	-	-	-	-	-	-	-	-	-	-	0.00413235	-	-	-	0.032825	-	-	-	-	-	-
heptacosanone (C27 methyl ketone)	-	-	-	-	-	-	-	-	-	-	-	0.0414842	0.0317712	-	-	-	-	-	-	-	-	-	-	-	-	-	-	-	-	-	-	0.181119	0.280418	0.367649	0.0437472	0.316238	0.0948511	0.108106	0.177519	0.195067	0.230584	0.300676
octacosanone (C28 methyl ketone)	-	-	-	-	-	-	-	-	-	-	-	-	-	-	-	-	-	-	-	-	-	-	-	-	-	-	-	-	-	-	-	0.00355574	-	-	-	0.0277867	-	-	-	0.00594351	-	-
nonacosanone (C29 methyl ketone)	-	-	-	-	-	-	-	-	-	-	-	-	-	-	-	-	-	-	-	-	-	-	-	-	-	-	-	-	-	-	-	0.0977989	0.188118	0.167176	0.0197554	0.232146	0.18706	0.0862888	0.198192	0.0958496	0.081747	0.215945
triacontanone (C30 methyl ketone)	-	-	-	-	-	-	-	-	-	-	-	-	-	-	-	-	-	-	-	-	-	-	-	-	-	-	-	-	-	-	-	-	-	-	-	-	-	-	-	0.00371285	-	-
hentriacontanone (C31 methyl ketone)	-	-	-	-	-	-	-	-	-	-	-	-	-	-	-	-	-	-	-	-	-	-	-	-	-	-	-	-	-	-	-	0.0164013	0.129057	0.0534455	-	0.124347	0.0513798	0.0301949	0.107686	0.0259259	-	0.0171967
tritriacontanone (C33 methyl ketone)	-	-	-	-	-	-	-	-	-	-	-	-	-	-	-	-	-	-	-	-	-	-	-	-	-	-	-	-	-	-	-	-	0.068375	-	-	-	-	-	0.0130697	-	-	-
sterols
5b(H)-cholestan-3a-ol (coprostanol)	-	-	-	-	-	-	-	-	-	-	-	-	-	-	-	-	-	-	-	-	-	-	-	-	-	-	-	-	-	-	-	0.0364687	0.0423501	-	-	-	0.0307354	0.0216359	0.034661	0.0693809	0.0213916	0.0278815
5a(H)-cholestan-3a-ol (epicholestanol)	-	-	-	-	-	-	-	-	-	-	-	-	-	-	-	-	-	-	-	-	-	-	-	-	-	-	-	-	-	-	-	0.280549	0.422563	0.478811	0.226737	0.298117	0.253528	0.31804	0.208223	0.268822	0.359817	0.248934
5b(H)-cholestan-3b-ol (epicoprostanol)	-	-	-	-	-	-	-	-	-	-	-	-	-	-	-	-	-	-	-	-	-	-	-	-	-	-	-	-	-	-	-	0.0177616	0.0271306	0.0327421	0.0239771	-	0.0220755	0.0252014	0.0208684	0.0354782	0.0358286	0.0157728
cholesta-5,22-dien-3b-ol	-	-	-	-	-	-	-	-	-	-	-	-	-	-	-	-	-	-	-	-	0.214273	-	0.101053	-	-	-	-	-	-	-	-	-	-	-	-	-	-	-	-	-	-	-
cholest-5-en-3b-ol (cholesterol)	0.658547	0.351238	0.179238	0.254762	0.46974	0.433817	0.926122	0.837759	0.610251	-	0.0551593	-	-	-	-	-	0.754232	0.291231	0.996321	3.32782	2.28282	0.393974	1.303	0.339486	0.521356	-	0.0612459	7.78211	6.66376	5.52279	13.1973	1.97029	1.31558	2.41418	1.23071	1.91328	1.52888	1.4478	1.01324	2.1149	1.39796	1.33487
5a(H)-cholestan-3b-ol (cholestanol)	-	-	-	-	-	-	-	-	-	-	-	-	-	-	-	-	-	-	-	-	-	-	-	-	-	-	-	-	-	-	-	1.16051	2.16083	2.66	0.741943	1.88385	0.651709	0.907682	0.82393	1.18275	0.612821	0.429596
24-methyl-5a(H)-cholestan-3b-ol	-	-	-	-	-	-	-	-	-	-	-	-	-	-	-	-	-	-	-	-	-	-	-	-	-	-	-	-	-	-	0.42815	0.280331	0.6178	1.12353	0.354443	0.724746	0.433556	0.246266	0.579959	0.707431	0.40025	0.420832
24b-methylcholesta-5,22E-dien-3b-ol (brassicasterol)	0.689448	0.55724	0.364333	0.427682	0.533233	0.595311	0.264321	0.241668	-	-	0.237633	0.184583	0.239276	0.235693	-	-	0.44607	-	0.029335	0.842278	0.464419	-	0.158925	-	-	-	-	0.282781	0.791732	-	0.854286	-	-	-	-	-	-	-	-	-	-	-
ergosta-5,7,22-trien-3b-ol (ergosterol)	0.163107	-	-	0.0554223	-	0.123524	0.120453	0.0604939	-	-	-	0.0904712	0.215863	0.385411	-	-	-	-	-	-	-	-	-	-	-	-	-	-	-	-	-	-	-	-	-	-	-	-	-	-	-	-
unidentified sterol	0.105512	0.308458	-	-	0.132882	0.242604	0.213145	0.183031	-	-	0.535468	0.231674	0.211391	0.677529	-	-	-	-	-	-	-	-	-	-	-	-	-	-	-	-	-	-	-	-	-	-	-	-	-	-	-	-
24b-methylcholest-5-en-3b-ol (campesterol)	0.647154	0.207121	0.803188	0.708567	0.383406	0.365983	0.291764	0.119705	-	-	0.208491	-	-	-	0.368673	0.613258	-	-	1.47979	-	-	-	0.0660857	-	0.340235	-	-	0.280423	0.360814	-	0.235985	-	-	-	-	-	0.32125	-	-	-	-	-
unidentified sterol	-	-	-	-	-	-	-	-	-	-	-	-	-	-	-	-	-	1.636	-	-	0.693891	-	-	-	-	-	-	-	-	-	-	-	-	-	-	-	-	-	-	-	-	-
unidentified sterol	-	-	-	-	-	-	-	-	-	-	-	-	-	-	-	-	-	-	-	-	0.212892	-	-	-	-	-	-	-	-	-	-	-	-	-	-	-	-	-	-	-	-	-
5a-campestan-3b-ol?	-	-	-	-	-	-	-	-	-	-	-	-	-	-	-	-	-	-	-	-	-	-	-	-	-	-	-	-	0.344186	-	-	-	-	-	-	-	-	-	-	-	-	-
24b-ethylcholesta-5,22E-dien-3b-ol (stigmasterol)	0.916313	0.365534	0.657811	0.608753	0.120438	0.631503	0.314539	0.190134	-	0.556485	0.227899	0.0585632	-	0.330694	-	-	-	7.34943	14.9554	-	0.222451	-	0.0693993	0.456179	0.727012	1.70224	1.63521	0.457283	0.481827	1.36264	0.552936	0.401146	0.46104	0.437216	0.408481	0.536501	0.431226	0.274047	0.22341	0.37153	0.338774	0.341626
24-ethylcholesta-5,24Z-dien-3b-ol?	-	-	-	-	-	-	-	-	-	-	-	-	-	-	-	-	-	-	-	3.44038	2.31884	-	-	-	-	-	-	-	-	-	-	-	-	-	-	-	-	-	-	-	-	-
24-ethyl-5a-cholest-22E-en-3b-ol	-	-	-	-	-	-	-	-	-	-	-	-	-	-	-	-	-	-	-	-	-	-	-	-	-	-	-	-	-	-	-	-	-	-	-	-	-	0.0188552	-	0.0306098	-	-
24-ethyl-5a-cholest-22E-en-3b-ol, isomer	-	-	-	-	-	-	-	-	-	-	-	-	-	-	-	-	-	-	-	-	-	-	-	-	-	-	-	-	-	-	-	0.387391	0.445753	0.547235	0.210445	0	0.324159	0.234571	0.494286	0.350246	0.285098	0.253227
24b-ethylcholest-5-en-3b-ol (b-sitosterol)	6.39524	5.32791	7.39806	8.27376	7.37872	11.5819	8.61894	10.1196	9.11148	2.85586	10.9702	10.6962	10.3372	16.6064	2.75604	5.09209	5.13344	20.7909	18.2867	6.00598	2.76661	0.386784	1.33648	3.04715	4.24825	8.59862	10.3199	3.51628	4.70148	7.62131	6.48196	3.03408	2.00346	2.77376	1.45994	4.27671	1.21453	1.44084	1.41921	2.77567	0.83313	1.52989
pregn-5-en-20-one?	-	-	-	-	-	-	-	-	-	-	-	-	-	-	-	-	-	-	-	-	-	-	0.131707	-	-	-	-	-	-	-	-	-	-	-	-	-	-	-	-	-	-	-
24-ethylcholest-5-en-3b-ol isomer	-	-	-	-	-	-	-	-	-	-	-	-	-	-	-	-	-	-	-	-	-	-	-	-	0.0585015	-	-	-	-	-	-	-	-	-	-	-	-	-	-	-	-	-
24-ethyl-5a(H)-cholestan-3b-ol (stigmastanol)	0.636321	0.284461	0.555999	0.469689	0.656799	0.67424	0.689279	0.827852	0.902081	-	0.617126	0.500923	0.132929	0.373712	-	0.51231	-	-	-	-	-	-	-	-	-	0.266497	0.304346	2.00976	3.08653	8.78379	5.82194	2.58592	5.08403	6.71402	2.66778	6.94893	3.81227	3.98436	4.54221	3.63565	3.09489	2.01248
4a,23,24-trimethylcholest-22E-dien-3b-ol (dinosterol)	-	-	-	-	-	-	-	-	-	-	-	-	-	-	-	-	-	-	-	-	-	-	-	-	-	-	-	-	-	-	-	1.20952	1.65944	1.34899	-	-	1.77516	0.672403	1.52861	1.49085	0.952323	1.2112
dinosterol isomer	-	-	-	-	-	-	-	-	-	-	-	-	-	-	-	-	-	-	-	-	-	-	-	-	-	-	-	-	-	-	-	-	0.408932	-	-	-	0.250433	-	-	0.312667	-	0.210128
4a,23,24-trimethylcholestan-3b-ol (dinostanol)	-	-	-	-	-	-	-	-	-	-	-	-	-	-	-	-	-	-	-	-	-	-	-	-	-	-	-	-	-	-	-	0.457268	0.311027	0.479793	0.264724	0.533542	0.193252	0.24862	0.180555	0.460078	0.268472	0.29443
dinostanol isomer	-	-	-	-	-	-	-	-	-	-	-	-	-	-	-	-	-	-	-	-	-	-	-	-	-	-	-	-	-	-	-	1.11568	1.82396	1.42465	0.991594	0.682918	1.24944	0.450347	1.37425	1.35448	1.11917	1.03368
24b-ethylcholest-4-en-3b-one (b-sitostenone)	0.573806	1.17135	0.246604	0.938334	0.777111	1.30602	0.498163	1.13078	0.3357	-	2.85555	1.55877	1.61492	5.06694	-	-	-	-	-	-	-	-	-	-	-	-	-	-	-	-	-	-	-	-	-	-	-	-	-	-	-	-
5a-lanosta-8,24-en-3b-ol (lanosterol)	-	-	-	-	-	-	-	-	-	-	-	-	-	-	-	-	-	-	-	-	-	-	-	-	-	-	-	-	0.244235	-	-	3.51185	3.52542	6.7567	3.36854	7.43832	4.24056	2.96903	4.09247	3.96481	3.02929	1.44432
others
- branched alcohols
13-methyltetradecan-1-ol (iso-C15 OH)	0.0298979	-	-	-	-	-	-	-	-	-	-	-	-	-	-	-	-	-	-	-	-	-	-	-	-	-	-	-	-	-	-	0.37512	0.470529	0.585583	0.255663	0.0325846	0.283302	0.449624	0.456306	0.246878	0.270365	0.203761
12-methyltetradecan-1-ol (anteiso-C15 OH)	-	-	-	-	-	-	-	-	-	-	-	-	-	-	-	-	-	-	-	-	-	-	-	-	-	-	-	-	-	-	-	0.24011	0.390192	0.283197	0.216844	0.0240774	0.262206	0.283221	0.390997	0.179729	0.116775	0.137644
15-methylhexadecan-1-ol (iso-C17 OH)	-	-	-	-	0.00622345	-	-	-	-	-	-	-	-	-	-	-	-	-	-	-	-	-	-	-	-	-	-	-	-	-	-	-	-	-	-	-	-	-	-	-	-	0.0110309
14-methylhexadecan-1-ol (anteiso-C17 OH)	-	-	-	-	0.0312713	-	-	-	-	-	-	-	-	-	-	-	-	-	-	-	-	-	-	-	-	-	-	-	-	-	-	-	-	-	-	-	-	-	-	-	-	0.0401852
17-methylnonadecan-1-ol (anteiso-C20 OH)	-	-	-	-	-	-	-	-	-	-	-	-	-	-	-	-	-	-	-	-	-	-	-	-	-	-	-	-	-	-	0.0452421	-	-	-	-	-	-	-	-	-	-	-
19-methyleicosan-1-ol (iso-C21 OH)	-	-	-	-	-	-	-	-	-	-	-	-	-	-	-	-	-	-	-	-	-	-	-	-	-	-	-	-	-	-	0.0166776	-	-	-	-	-	-	-	-	-	-	-
18-methyleicosan-1-ol (anteiso-C21 OH)	-	-	-	-	-	-	-	-	-	-	-	-	-	-	-	-	-	-	-	-	-	-	-	-	-	-	-	-	-	-	0.0361897	-	-	-	-	-	-	-	-	-	-	-
- diacids
hexadecanedioic acid (C16 a,w-DiFA)	0.213736	0.0919204	0.181624	0.362905	0.202073	0.283316	0.0968776	0.146532	-	-	-	-	0.138308	-	-	-	-	-	-	-	-	-	-	-	-	-	-	-	-	-	-	-	-	-	-	-	-	-	-	-	-	-
octadecanedioic acid (C18 a,w-DiFA)	-	-	-	0.125525	0.0928326	0.0894329	-	-	-	-	-	-	0.0347462	-	-	-	-	-	-	-	-	-	-	-	-	-	-	-	-	-	-	-	-	-	-	-	-	-	-	-	-	-
eicosanedioic acid (C20 a,w-DiFA)	0.107277	0.0551931	0.0842163	0.124744	0.142243	0.133838	0.0490412	-	-	-	-	-	0.0350634	-	-	-	-	-	-	-	-	-	-	-	-	-	-	-	-	-	-	-	-	-	-	-	-	-	-	-	-	-
heneicosanedioic acid (C21 a,w-DiFA)	-	-	0.0232618	0.0688377	-	0.0265576	-	-	-	-	-	-	0.0413067	-	-	-	-	-	-	-	-	-	-	-	-	-	-	-	-	-	-	-	-	-	-	-	-	-	-	-	-	-
docosanedioic acid (C22 a,w-DiFA)	0.351711	0.142061	0.38489	0.405944	0.369295	0.29407	0.195778	0.135691	-	-	-	-	-	-	-	-	-	-	-	-	-	-	-	-	-	-	-	-	-	-	-	-	-	-	-	-	-	-	-	-	-	-
tricosanedioic acid (C23 a,w-DiFA)	-	-	-	0.0627967	-	0.0364541	-	-	-	-	-	-	0.0525848	-	-	-	-	-	-	-	-	-	-	-	-	-	-	-	-	-	-	-	-	-	-	-	-	-	-	-	-	-
tetracosanedioic acid (C24 a,w-DiFA)	-	0.0335073	-	0.174905	0.184356	0.125099	0.16028	0.0763098	-	-	-	-	-	-	-	-	-	-	-	-	-	-	-	-	-	-	0.128783	-	-	-	-	-	-	-	-	-	-	-	-	-	-	-
hexacosanedioic acid (C26 a,w-DiFA)	-	-	-	0.0588618	-	0.0392685	-	-	-	-	-	-	-	-	-	-	-	-	-	-	-	-	-	-	-	-	0.0972178	-	-	-	-	-	-	-	-	-	-	-	-	-	-	-
- miscellaneous
2,5,7,8-tetramethyl-2-(4,8,12-trimethyltridecyl)-6-chromanol (a-tocopherol)	0.503815	0.222359	0.247158	0.382547	-	0.690291	0.34566	0.244507	-	-	3.57846	1.83347	3.26477	3.19614	0.437051	0.196075	-	0.177992	0.388332	0.148359	0.138012	-	-	0.564337	0.945375	0.131557	0.0907866	-	-	-	-	0.71011	-	0.172103	0.864709	0.558626	0.885633	0.998878	0.66903	0.412197	0.763714	0.642796
cholest-7-en…?	-	-	-	-	-	-	-	-	-	-	-	-	-	-	-	-	-	-	-	-	-	-	-	-	0.130778	-	-	-	-	-	-	-	-	-	-	-	-	-	-	-	-	-
olean-12-en-3b-ol (b-amyrin)	0.522994	0.623236	0.299297	0.298162	0.134052	0.428012	0.25118	-	1.22464	-	0.605904	0.264048	0.723021	-	3.38122	6.54354	-	-	-	-	-	-	-	-	-	-	-	-	-	-	-	0.565743	1.56718	1.24525	0.717942	0.800025	0.812436	0.563776	0.8531	0.736602	0.610627	0.48784
urs-12-en-3b-ol (a-amyrin)	0.60793	0.423183	0.345315	0.386893	0.458207	0.375758	-	-	-	-	1.14924	0.86146	0.858835	-	1.68797	1.46762	-	-	-	-	-	-	-	-	-	-	-	-	0.0790729	-	-	-	-	-	-	-	-	-	-	-	-	-
stigmast-3,5-dien-7-one	-	-	-	-	-	-	-	-	-	-	-	-	-	-	-	-	-	-	-	-	-	-	-	-	-	-	-	0.252891	0.364502	1.61485	0.707577	-	-	-	-	-	-	-	-	-	-	-
lup-20(29)-en-3-one (lupenone)	-	-	-	-	-	-	-	-	-	-	4.9599	4.10117	4.51729	-	-	-	-	-	-	-	-	-	-	-	-	-	-	-	-	-	-	-	-	-	-	-	-	-	-	-	-	-
5a-taraxast-20(30)-en-3b-ol (taraxasterol)	-	-	0.83719	-	-	-	-	-	-	-	7.12138	12.0359	10.5396	-	-	-	-	-	-	-	-	-	-	-	-	-	-	-	-	-	-	-	-	-	-	-	-	-	-	-	-	-
1,15-triacontadiol	-	-	-	-	-	-	-	-	-	-	-	-	-	-	-	-	-	-	-	-	-	-	-	-	-	-	-	-	-	-	-	2.22332	2.60145	3.05526	1.27408	2.02498	1.53882	2.14051	1.5875	3.10025	2.54071	1.58662
24-ethylcholesta-3,5-dien-7-one	-	-	-	-	-	-	-	-	-	-	0.598038	1.18636	0.519023	-	-	-	-	-	-	-	-	-	-	-	-	-	-	-	-	-	-	-	-	-	-	-	-	-	-	-	-	-
1,15(w16)C30keto-ol	-	-	-	-	-	-	-	-	-	-	-	-	-	-	-	-	-	-	-	-	-	-	-	-	-	-	-	-	-	-	-	0.973594	1.29286	1.57984	0.405777	0.920775	0.569304	0.793084	0.73212	1.47474	1.56085	1.35744
gammaceran-3β-ol (tetrahymanol)	-	-	-	-	-	-	-	-	-	-	-	-	-	-	-	-	-	-	-	-	-	-	-	-	-	-	-	-	-	-	-	0.848645	1.05663	1.69437	0.371343	1.62213	0.530753	0.853536	0.719639	0.899031	0.844112	0.685645
unidentified triterpenoid	-	-	-	-	-	-	-	-	-	-	-	-	0.200496	-	-	-	-	-	-	-	-	-	-	-	-	-	-	-	-	-	-	-	-	-	-	-	-	-	-	-	-	-
triterpenoid?	-	-	-	-	-	-	-	-	-	-	0.515255	1.62526	1.18957	-	-	-	-	-	-	-	-	-	-	-	-	-	-	-	-	-	-	-	-	-	-	-	-	-	-	-	-	-
unidentified triterpenoid	-	-	-	-	-	-	-	-	-	-	-	-	-	-	-	-	-	-	-	-	-	-	-	-	-	-	0.090722	-	-	-	-	-	-	-	-	-	-	-	-	-	-	-
triterpenoid?	-	-	-	-	-	-	-	-	-	-	-	-	0.664286	-	-	-	-	-	-	-	-	-	-	-	-	-	-	-	-	-	-	-	-	-	-	-	-	-	-	-	-	-
unidentified triterpenoid	-	-	-	-	-	-	-	-	-	-	-	0.84865	0.890519	-	-	-	-	-	-	-	-	-	-	-	-	-	1.17147	-	-	-	-	-	-	-	-	-	-	-	-	-	-	-
b-apo-4'-carotenoic acid?	-	-	-	-	-	-	-	-	-	-	-	-	-	-	-	-	-	-	-	-	-	-	-	-	-	-	-	0.618729	0.977463	-	1.60392	-	-	-	-	-	-	-	-	-	-	-
stigmast-4-ene-3-one	-	-	0.243481	-	-	-	-	-	-	-	-	-	-	-	-	-	-	-	-	-	-	-	-	-	-	0.594287	1.59013	-	-	-	-	-	-	-	-	-	-	-	-	-	-	-
17b(H),21b(H)-homohopanoic acid	-	-	-	-	-	-	-	-	-	-	-	-	-	-	-	-	-	-	-	-	-	-	-	-	-	-	-	-	-	-	-	0.752033	0.934327	0.699364	0.491839	0.994936	0.363813	0.518851	0.57457	0.862567	0.853459	0.793845
1,15-dotriacontadiol	-	-	-	-	-	-	-	-	-	-	-	-	-	-	-	-	-	-	-	-	-	-	-	-	-	-	-	-	-	-	-	0.663383	0.698462	1.06138	0.706363	0.629315	0.960211	0.839926	0.687551	0.905856	1.31961	0.592094
17b(H),21b(H)-bishomohopanol	-	-	-	-	-	-	-	-	-	-	-	-	-	-	-	-	-	-	-	-	-	-	-	-	-	-	-	-	-	-	-	0.667091	1.08721	1.73528	0.174227	1.93343	0.474207	0.619787	0.646502	0.916974	0.452347	0.48503
17b(H),21b(H)-bishomohopanoic acid	-	-	-	-	-	-	-	-	-	-	-	-	-	-	-	-	-	-	-	-	-	-	-	-	-	-	-	-	-	-	-	9.45761	4.99835	3.26703	9.46263	9.92688	10.7606	7.96511	12.3993	8.25737	10.0287	6.15147
										* different extraction method and analytical instrumenbtation, no response factors determined
