# Supplementary figures and images for: Improved end-member characterisation of modern organic matter pools in the Ohrid Basin (Albania, Macedonia) and evaluation of new palaeoenvironmental proxies
Source: Copernicus journal article supplement (doi:10.5194/bg-13-795-2016), 2016-02-11

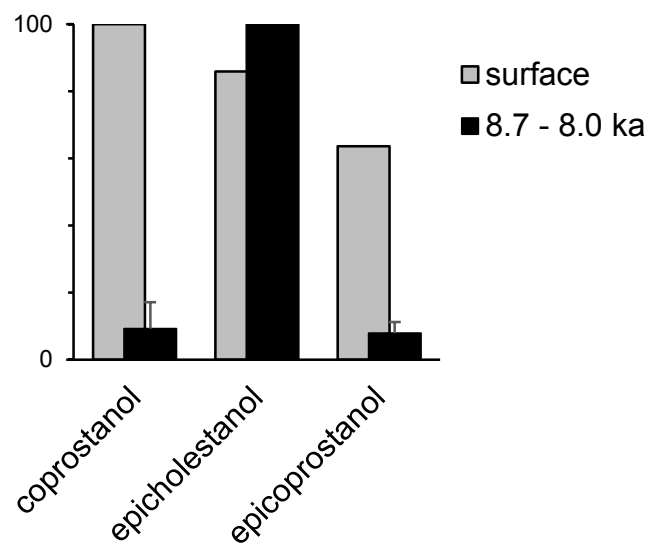

Supplement: Supplementary file 3 [file bg-13-795-2016-supplement.zip]

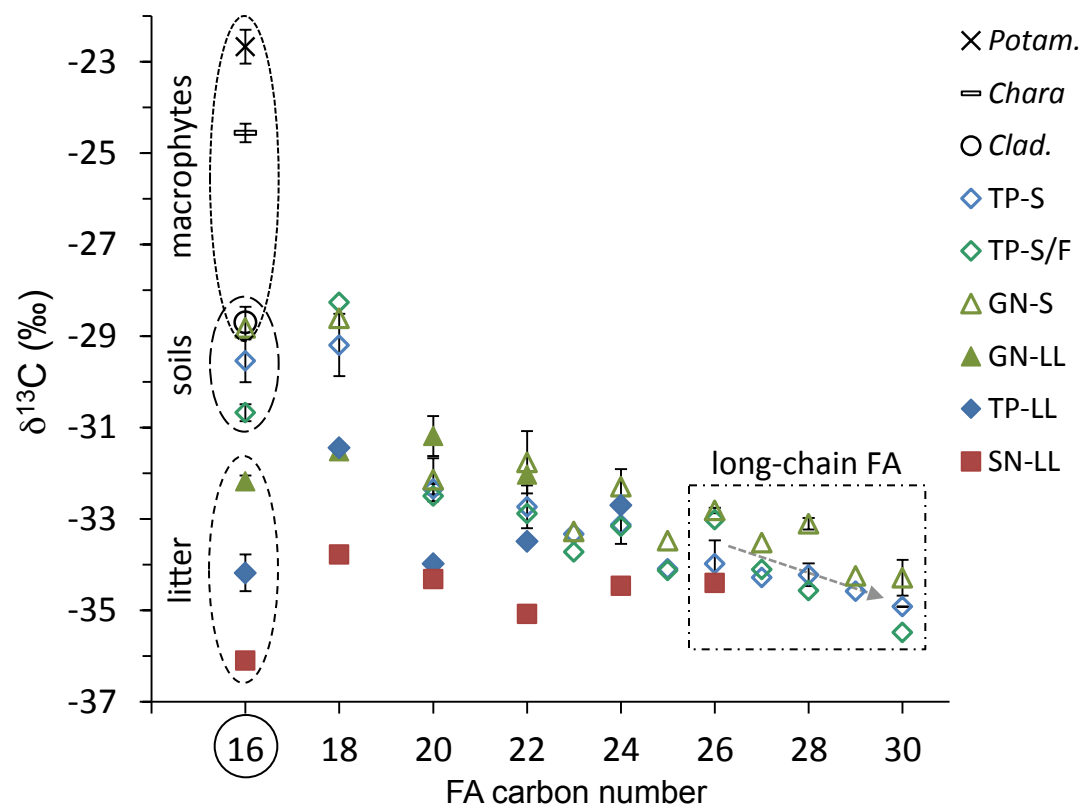

Supplement: Supplementary file 4 [file bg-13-795-2016-supplement.zip]

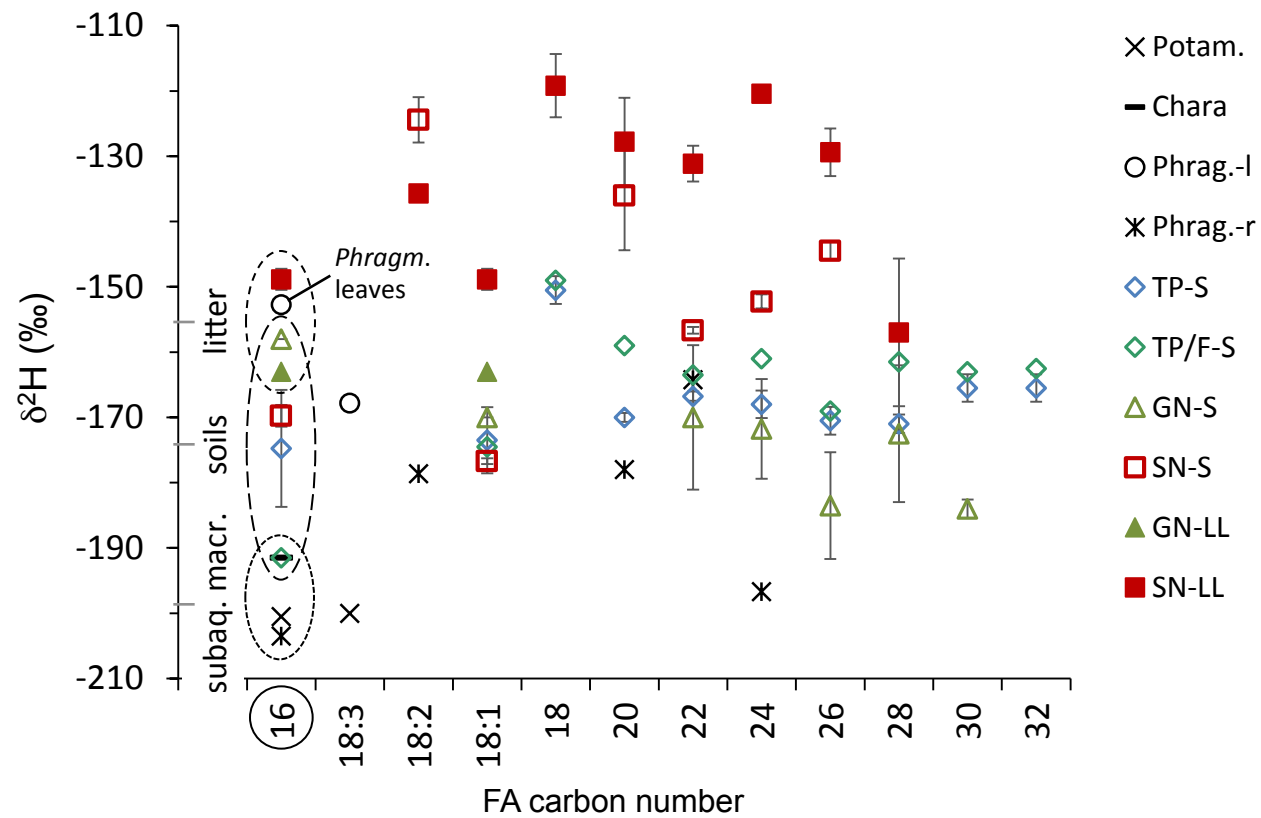

Supplement: Supplementary file 7 [file bg-13-795-2016-supplement.zip]
